# Supplementary material for: Contrasting effects of acute and chronic stress on the transcriptome, epigenome, and immune response of Atlantic salmon
Source: PubMed Central journal article supplement (PMC6986783; doi:10.1080/15592294.2018.1554520), 2018-12-13
Supplement: kepi-13-12-1554520-s001.pdf [file kepi-13-12-1554520-s001.pdf]

## SUPPORTING INFORMATION

### Contrasting effects of acute and chronic stress on the transcriptome, epigenome, and on immune response of Atlantic salmon

Tamsyn M. Uren Webster<sup>1</sup>, Deiene Rodriguez-Barreto<sup>1</sup>, Samuel A.M. Martin<sup>2</sup>, Cock van Oosterhout<sup>3</sup>, Pablo Orozco-terWengel<sup>4</sup>, Joanne Cable<sup>4</sup>, Alastair Hamilton<sup>5</sup>, Carlos Garcia de Leaniz<sup>1</sup>, Sofia Consuegra<sup>1</sup>

1. College of Science, Swansea University, SA2 8PP, UK
2. College of Life Sciences & Medicine, University of Aberdeen, AB24 2TZ, UK
3. School of Environmental Sciences, University of East Anglia, NR4 7TJ, UK
4. School of Biosciences, Cardiff University CF10 3AX, UK
5. Landcatch Natural Selection Ltd, Stirling, FK9 4NF, UK.

#### **This supporting information contains:**

**Page 2:** Supplementary methods

**Page 5:** Table S1. Morphometric data collected throughout the experiment

**Page 6:** Table S2. Summary of statistics for RNA-seq libraries

**Page 7:** Table S3. Differentially expressed genes in acutely stressed fish

**Page 8:** Table S4. Differentially expressed genes in chronically stressed fish.

**Page 12:** Table S5. Selected immune genes differentially regulated by LPS

**Page 16:** Table S6. Summary of statistics for RRBS libraries

**Page 17:** Table S7. Genes with altered expression and p.promoter methylation in stress groups

**Page 19:** Table S8. Genes with altered expression and gene body methylation in stress groups

**Page 21:** Figure S1. Enrichment analysis for DE genes in chronically-stressed fish

**Page 22:** Figure S2. PCA plot illustrating transcriptomic response to 20 µg/ml LPS.

**Page 23:** Figure S3. Heat map illustrating transcriptomic response to LPS

**Page 24:** Figure S4. Enrichment analysis for DE genes in response to LPS exposure

**Page 25:** Figure S5. Enrichment analysis for genes for which a significant interaction between stress and LPS response was identified

**Page 26:** Figure S6. Functional enrichment analysis of genes in which DM CpGs were identified

**Page 27:** Figure S7. Enrichment analysis for genes for which stress altered both expression and DNA methylation

**Page 28:** Figure S8. Transcription and methylation data of genes for which a significant interaction between stress and transcriptional response to LPS was identified

## **Supplementary methods**

### *Fish maintenance*

Each experimental group (controls, acute stress and chronic stress) consisted of two replicate vertical tray incubators (each containing 500 eggs), and larvae from each replicate tray were transferred to a separate replicate fry trough (length 100 cm, width 40 cm, depth 8 cm) following hatching (at 475 degree days, DD). Egg incubators and fry troughs were supplied with a constant flow (~ 3 L/min) of aerated de-chlorinated tap water in a recirculation system. Fry were offered food prior to the start of feeding (at 850 DD), and fed Nutraplus salmonid feed (Skretting, UK). Water oxygen saturation was maintained above 90%, and ammonia (<0.02 mg/L), nitrite (<0.01 mg/L), nitrate (<15 mg/L) and pH (7.5 ± 0.2) levels were maintained within the optimal range for the species. Water temperature was increased from 9 °C to 11 °C (0.5 °C increase per month) and photoperiod was adjusted from 10:14h to 14:10h light: dark over the 4 month experimental period, to reflect seasonal variation. At each sampling point fish were euthanised via an overdose of anaesthetic (Phenoxyethanol; 0.5 mg/L), followed by destruction of the brain according to UK Home Office regulations.

### *Transcriptome and methylome sequencing*

RNA and DNA were simultaneously extracted using the Qiagen AllPrep DNA/RNA Mini Kit, according to the manufacturer's instructions and then nucleic acid concentration was assessed using a Qubit 3.0 Fluorometer (Thermo Fisher Scientific, UK).

Transcriptomic analysis was conducted using RNA-seq. RNA purity and integrity was assessed using a NanoDrop NS-100 Spectrophotometer (NanoDrop Technologies, USA) and an Agilent 2100 Bioanalyzer (Agilent Technologies, USA). All RNA used for library construction was of high quality with 260/230 and 260/280 ratios > 1.8 and RIN scores >8. Library preparation was performed using the Illumina TruSeq RNA Library Prep Kit v2, with 1 µg total input RNA. Sequencing of the 48 libraries was performed on an Illumina NextSeq500 platform at University of Aberdeen, across a total of eight flow cells, using 76 bp paired-end sequencing.

Methylation analysis was performed using Reduced Representation Bisulfite Sequencing (RRBS). Bisulphite converted genomic DNA libraries were prepared using the Diagenode Premium RRBS Kit, including fully methylated and un-methylated spike-in controls to monitor bisulphite conversion efficiencies. Briefly, 100 ng of genomic DNA were digested with *MspI*, followed by end-repair, adaptor ligation and bead-based fragment size selection. 24 samples were multiplexed in pools of six following the manufacturers' recommendations. After multiplexing, the pooled samples were bisulphite-converted, amplified by enrichment PCR, and quality checked using the Agilent D1000 ScreenTape System. The libraries were then sequenced across 6 lanes on Illumina NextSeq 500 platform at Cardiff University using 76 bp single-end sequencing.

### *Transcriptomic analysis*

Quality screening of raw reads was performed using FastQC (Andrews 2010). Trimmomatic (Bolger et al. 2014) was used to remove contaminating adaptor sequences and the last three bp of all reads (containing nucleotide bias), and trim poor quality bases from the 3' end using a sliding window of 4 bp, and specifying Q≥20. All reads < 30 bp in length were discarded. High quality paired reads from each sample were then aligned to the Atlantic salmon genome (v GCF\_000233375.1\_ICSAAG\_v2; (Davidson et al. 2010; Lien et al. 2016)) using HISAT2 (v 2.1.0; (Kim et al. 2015)), after first converting the GFF3 annotation file to a GTF file using gffread (Pertea 2016), to enable splice-aware alignment and novel transcript discovery. SAM alignment files were converted to sorted BAM files using samtools v 1.5 (Li et al. 2009), and transcript reconstruction and assembly was then performed using StringTie (v1.3.3) using recommended parameters (Pertea et

al. 2015). Non-normalised read counts for the set of merged assembled transcripts were then extracted using the prepDE.py script supplied in the StringTie package.

Differential expression analysis was performed using DeSeq2 (Love et al. 2014) for 78,229 putative loci with at least 1 read count in more than one sample. Differentially expressed genes in response to stress and LPS exposure were identified using a multifactorial design, including the main effects of stress and LPS exposure, and their interaction, and accounting for potential variation between replicate tanks. Within the model, independent filtering of loci with low coverage depth was applied, optimising power for identification of differentially expressed transcripts at a threshold of  $\alpha=0.05$ . Default settings were applied for outlier detection and moderation of gene-wise dispersion estimates. Genes were considered significantly differentially expressed at  $FDR < 0.05$ , and the contrast function was used to extract differentially expressed gene identities.

For visualisation and cluster analysis, raw counts were normalised using variance stabilising transformation within DeSeq2. Multidimensional scaling (MDS) analysis was performed using pairwise distances between all samples, and visualised using ggplot2 (Wickham 2009). Heat maps were constructed to visualise transcriptional response to LPS, and the effect of each type of stress on transcriptional response to LPS. Hierarchical clustering of all genes significantly regulated by LPS, and all genes for which a significant interaction between stress and LPS response was identified, was performed using an Euclidean distance metric and visualised using the Pheatmap package in R (Kolde 2015). Functional enrichment analysis of differentially regulated genes was performed using DAVID (v 6.8; (Huang et al. 2008)), using all expressed genes in the gill transcriptome as background, and considering terms significantly enriched with  $q < 0.05$  after multiple test correction (Benjamini-Hochberg). Due to the lack of gene ontology terms attached to Atlantic salmon gene ids, the enrichment analysis was conducted on zebrafish orthologs which were identified using Blastx against the Uniprot peptide database (specifying a minimum e value cutoff of  $1e^{-15}$ ).

### *Methylation analysis*

Following initial quality assessment of raw sequences using FastQC (Andrews 2010), TrimGalore (Kreger 2016) was used to trim low-quality base calls and adapter contamination using the '-- rrbs' option and specifying  $Q \geq 20$ . High quality reads were aligned to the Atlantic salmon reference genome and cytosine methylation calls extracted using Bismark v 0.17.0 (Krueger & Andrews 2011) using the '--comprehensive' parameter. Mapped data were then processed using SeqMonk (Andrews 2007) within R, considering only methylation within CpG context. Only CpGs with a minimum coverage of 10 reads in each of the 24 samples were included in the analysis, and extreme coverage outliers ( $>99.9^{\text{th}}$  percentile) were removed. CpG island locations were predicted using the newcpGREport tool within EMBOSS (Rice et al. 2000), defining islands as regions of  $\geq 200$  bp with GC %  $\geq 55\%$  and an observed-to-expected CpG ratio of  $\geq 65\%$ , island shores as regions located up to 2 kb of a CpG island, and shelves as 2 kb regions from a CpG shore.

Differentially methylated CpGs (DMCpGs) were identified using logistic regression tests on the quantitated normalised data based on  $FDR < 0.01$  after multiple testing correction (Benjamini-Hochberg) and  $>20\%$  minimal CpG methylation difference ( $|\Delta M|$ ). For each DMCpG, we identified the genomic location (within gene body, promoter region ( $\leq 1500$  bp upstream of the transcription start site (TSS)), or intergenic region) and the context location (CpG island, CpG shore, CpG shelf). For the DMCpGs that were within a gene, or within 2 kb (upstream or downstream) of the TSS or transcription termination site (TTS) respectively, we also performed enrichment analysis based on gene function using DAVID v 6.8 (Huang et al. 2008), after converting to zebrafish ids as described above. To generate a more stringent list of DMCpGs for further cluster analysis between stress groups, we additionally ran t-tests for each paired comparison using a threshold of  $p < 0.01$ , to identify DMCpGs shared by both statistical methods.

## References

- Andrews, S. 2007 SeqMonk: A tool to visualise and analyse high throughput mapped sequence data. <https://www.bioinformatics.babraham.ac.uk/projects/seqmonk/>.
- Andrews, S. 2010 FastQC A Quality Control tool for High Throughput Sequence Data. <http://www.bioinformatics.babraham.ac.uk/projects/fastqc/>.
- Bolger, A. M., Lohse, M. & Usadel, B. 2014 Trimmomatic: a flexible trimmer for Illumina sequence data. *Bioinformatics* **30**, 2114-20.
- Davidson, W. S., Koop, B. F., Jones, S. J., Iturra, P., Vidal, R., Maass, A., Jonassen, I., Lien, S. & Omholt, S. W. 2010 Sequencing the genome of the Atlantic salmon (*Salmo salar*). *Genome Biology* **11**, 403-410.
- Huang, D. W., Sherman, B. T. & Lempicki, R. A. 2008 Systematic and integrative analysis of large gene lists using DAVID bioinformatics resources. *Nature Protocols* **4**, 44-57.
- Kim, D., Langmead, B. & Salzberg, S. L. 2015 HISAT: a fast spliced aligner with low memory requirements. *Nature Methods* **12**, 357-360.
- Kolde, R. 2015 Pretty Heatmaps. *R package version 3.1-131*.
- Kreger, F. 2016 TrimGalore. A wrapper around Cutadapt and FastQC to consistently apply adapter and quality trimming to FastQ files, with extra functionality for RRBS data. [https://www.bioinformatics.babraham.ac.uk/projects/trim\\_galore/](https://www.bioinformatics.babraham.ac.uk/projects/trim_galore/).
- Krueger, F. & Andrews, S. R. 2011 Bismark: a flexible aligner and methylation caller for Bisulfite-Seq applications. *Bioinformatics* **27**, 1571-1572.
- Li, H., Handsaker, B., Wysoker, A., Fennell, T., Ruan, J. & Homer, N. 2009 The Sequence Alignment/Map format and SAMtools. *Bioinformatics* **25**, 2078-2079.
- Lien, S., Koop, B. F., Sandve, S. R., Miller, J. R., Kent, M. P., Nome, T., Hvidsten, T. R., Leong, J. S., Minkley, D. R., Zimin, A., Grammes, F., Grove, H., Gjuvsland, A., Walenz, B., Hermansen, R. A., von Schalburg, K., Rondeau, E. B., Di Genova, A., Samy, J. K. A., Olav Vik, J., Vigeland, M. D., Caler, L., Grimholt, U., Jentoft, S., Inge Våge, D., de Jong, P., Moen, T., Baranski, M., Palti, Y., Smith, D. R., Yorke, J. A., Nederbragt, A. J., Tooming-Klunderud, A., Jakobsen, K. S., Jiang, X., Fan, D., Hu, Y., Liberles, D. A., Vidal, R., Iturra, P., Jones, S. J. M., Jonassen, I., Maass, A., Omholt, S. W. & Davidson, W. S. 2016 The Atlantic salmon genome provides insights into rediploidization. *Nature* **533**, 200-205.
- Love, M. I., Huber, W. & Anders, S. 2014 Moderated estimation of fold change and dispersion for RNA-seq data with DESeq2. *Genome Biology* **15**, 550-555.
- Pertea, G. 2016 gffread. available at: <https://github.com/gpertea/gffread>.
- Pertea, M., Pertea, G. M., Antonescu, C. M., Chang, T.-C., Mendell, J. T. & Salzberg, S. L. 2015 StringTie enables improved reconstruction of a transcriptome from RNA-seq reads. *Nature Biotechnology* **33**, 290-295.
- Rice, P., Longden, I. & Bleasby, A. 2000 EMBOSS: the European Molecular Biology Open Software Suite. *Trends in Genetics* **16**, 276-277.
- Wickham, H. 2009 *ggplot2: Elegant Graphics for Data Analysis*: Springer-Verlag New York.

**Table S1. Morphometric data collected throughout the experiment.**

|                               | Control A   | Control B   | Chronic stress A | Chronic stress B | Acute stress A | Acute stress B | Statistical significance     |
|-------------------------------|-------------|-------------|------------------|------------------|----------------|----------------|------------------------------|
| Hatching rate (%)             | 94.6        | 96.6        | 96.6             | 95.2             | 94.0           | 94.6           | $F_{3,2}=1.38, P=0.377$      |
| Post-hatch mortality rate (%) | 11.8        | 10.8        | 10.2             | 11.8             | 9.2            | 11.8           | $F_{3,2}=0.19, P=0.836$      |
| Mass (mg) 492 DD              | 187.4 ±6.2  | 185.5 ±10.0 | 183.3 ±3.5       | 185.5 ±7.8       | 183.3 ±6.2     | 189.6 ±4.6     | $F_{3,114}=0.37, P=0.718$    |
| Mass (mg) 748 DD              | 194.3 ±15.2 | 189.5 ±15.5 | 156.9 ±13.8      | 168.6 ±16.6      | 197.9 ±27.3    | 189.6 ±19.0    | $F_{3,114}=15.82, P=0.025^*$ |
| Mass (mg) 1019 DD             | 236.2 ±24.6 | 246.3 ±37.0 | 216.7 ±28.3      | 200.6 ±34.7      | 249.6 ±34.5    | 256.6 ±34.8    | $F_{3,114}=15.42, P=0.026^*$ |
| Mass (mg) 1323 DD             | 287.9 ±43.1 | 337.0 ±29.8 | 281.5 ±26.2      | 262.2 ±27.8      | 310.7 ±62.6    | 290.5 ±56.6    | $F_{3,114}=1.63, P=0.330$    |
| Mass (mg) 1532 DD             | 381.0 ±73.1 | 329.8 ±102  | 348.9 ±76.3      | 329.9 ±72.5      | 376.1 ±110     | 410.7 ±96.1    | $F_{3,114}=4.78, P=0.117$    |
| Length (cm) 1532 DD           | 3.54 ±0.19  | 3.58 ±0.28  | 3.50 ±0.31       | 3.39 ±0.26       | 3.47 ±0.26     | 3.62 ±0.28     | $F_{3,114}=1.36, P=0.381$    |
| Condition factor (1532 DD)    | 0.85 ±0.09  | 0.84 ±0.09  | 0.81 ±0.11       | 0.83 ±0.07       | 0.86 ±0.07     | 0.85 ±0.05     | $F_{3,114}=2.18, P=0.260$    |

Hatching rate and mortality rate; n=2 replicate tanks/ treatment. Mass and condition factor; n=20 individuals per tank, values presented are mean ±SD. Asterisks indicate significant stress effect ( $P < 0.05$ , using linear mixed effect models).

**Table S2. Summary of statistics for RNA-seq libraries**

| Group                | Sample ID | Paired raw reads (millions) | QC reads (millions) | Total alignment (%) | Unique alignment % | Library size factor |
|----------------------|-----------|-----------------------------|---------------------|---------------------|--------------------|---------------------|
| Control              | 48        | 32.62                       | 30.01               | 94.48               | 83.14              | 1.03                |
| Control              | 16        | 32.79                       | 30.27               | 95.72               | 85.54              | 1.05                |
| Control              | 47        | 34.11                       | 31.25               | 94.70               | 84.16              | 1.07                |
| Control              | 45        | 34.99                       | 31.85               | 93.64               | 83.89              | 1.10                |
| Control              | 15        | 36.10                       | 33.74               | 93.79               | 83.02              | 1.15                |
| Control              | 17        | 36.94                       | 34.16               | 94.35               | 83.64              | 1.17                |
| Control              | 18        | 39.01                       | 35.99               | 94.11               | 83.47              | 1.23                |
| Control              | 46        | 39.57                       | 36.51               | 95.64               | 85.10              | 1.27                |
| Substrate stress     | 36        | 29.15                       | 26.46               | 94.85               | 84.34              | 0.91                |
| Substrate stress     | 39        | 31.91                       | 28.93               | 95.91               | 85.15              | 1.02                |
| Substrate stress     | 40        | 32.10                       | 29.97               | 95.41               | 84.43              | 1.05                |
| Substrate stress     | 10        | 34.42                       | 31.24               | 96.26               | 86.13              | 1.10                |
| Substrate stress     | 37        | 36.94                       | 34.13               | 94.57               | 83.91              | 1.17                |
| Substrate stress     | 9         | 38.58                       | 34.95               | 95.40               | 84.97              | 1.21                |
| Substrate stress     | 35        | 38.79                       | 35.93               | 94.87               | 82.49              | 1.25                |
| Substrate stress     | 38        | 40.49                       | 37.09               | 95.22               | 83.71              | 1.30                |
| Cold shock           | 57        | 34.89                       | 31.48               | 94.98               | 84.40              | 1.09                |
| Cold shock           | 26        | 38.48                       | 34.02               | 93.18               | 83.15              | 1.14                |
| Cold shock           | 58        | 37.88                       | 34.80               | 93.24               | 82.61              | 1.17                |
| Cold shock           | 28        | 41.83                       | 37.81               | 94.75               | 83.93              | 1.31                |
| Cold shock           | 27        | 41.60                       | 37.98               | 93.35               | 83.04              | 1.29                |
| Cold shock           | 55        | 43.99                       | 39.19               | 94.67               | 83.86              | 1.35                |
| Cold shock           | 56        | 43.70                       | 39.96               | 93.57               | 82.89              | 1.35                |
| Cold shock           | 25        | 44.60                       | 40.79               | 93.35               | 83.01              | 1.38                |
| LPS Control          | 113       | 16.13                       | 14.56               | 85.4                | 75.99              | 0.47                |
| LPS Control          | 115       | 14.32                       | 13.07               | 93.8                | 83.52              | 0.43                |
| LPS Control          | 117       | 21.81                       | 20.61               | 93.64               | 82.88              | 0.71                |
| LPS Control          | 118       | 22.74                       | 20.96               | 94.56               | 84.01              | 0.72                |
| LPS Control          | 149       | 19.50                       | 17.98               | 95.63               | 84.36              | 0.60                |
| LPS Control          | 150       | 14.93                       | 13.80               | 96.01               | 85.51              | 0.45                |
| LPS Control          | 152       | 29.54                       | 27.28               | 96.76               | 85.87              | 0.91                |
| LPS Control          | 153       | 37.18                       | 34.42               | 86.06               | 75.81              | 1.08                |
| LPS Substrate stress | 103       | 29.94                       | 27.00               | 96.36               | 86.23              | 0.86                |
| LPS Substrate stress | 104       | 17.64                       | 16.12               | 97.03               | 86.11              | 0.53                |
| LPS Substrate stress | 105       | 29.32                       | 26.83               | 95.33               | 85.61              | 0.92                |
| LPS Substrate stress | 106       | 32.50                       | 29.87               | 97.06               | 86.56              | 1.03                |
| LPS Substrate stress | 137       | 27.58                       | 25.65               | 96.71               | 86.56              | 0.87                |
| LPS Substrate stress | 138       | 40.05                       | 37.69               | 96.66               | 85.77              | 1.27                |
| LPS Substrate stress | 139       | 28.82                       | 26.60               | 96.73               | 85.93              | 0.89                |
| LPS Substrate stress | 142       | 25.63                       | 23.56               | 89.23               | 78.89              | 0.77                |
| LPS Cold shock       | 126       | 30.41                       | 27.50               | 95.51               | 85.79              | 0.89                |
| LPS Cold shock       | 127       | 31.24                       | 28.75               | 93.33               | 82.93              | 0.91                |
| LPS Cold shock       | 128       | 35.76                       | 32.70               | 94.95               | 85.12              | 1.07                |
| LPS Cold shock       | 130       | 30.61                       | 28.16               | 92.93               | 82.41              | 0.96                |
| LPS Cold shock       | 161       | 25.79                       | 23.54               | 94.18               | 83.04              | 0.74                |
| LPS Cold shock       | 163       | 35.55                       | 32.45               | 97.07               | 85.67              | 1.11                |
| LPS Cold shock       | 165       | 32.67                       | 30.98               | 84.98               | 75.26              | 0.97                |
| LPS Cold shock       | 166       | 23.26                       | 21.57               | 85.10               | 75.74              | 0.67                |
| <i>Mean</i>          |           | 30.23                       | 27.83               | 94.54               | 84.13              |                     |

**Table S3.** Differentially expressed genes in fish subject to acute stress compared to the control group (FDR <0.05). Shading indicates up (red) or down (green) regulation.

| Accession      | Log2 Fold Change | FDR      | Gene name    | Gene description                                                                   |
|----------------|------------------|----------|--------------|------------------------------------------------------------------------------------|
| XR_001329667.1 | -5.59            | 3.76E-06 | LOC106609253 | uncharacterized ncRNA                                                              |
| XM_014133628.1 | 2.82             | 3.85E-02 | LOC106565937 | tumor necrosis factor receptor superfamily member 21-like 2C transcript variant X1 |
| XLOC_010727    | 2.62             | 3.87E-02 | XLOC_010727  | na                                                                                 |
| XLOC_070250    | -3.84            | 3.88E-02 | XLOC_070250  | na                                                                                 |
| XLOC_085183    | 3.65             | 3.89E-02 | XLOC_085183  | na                                                                                 |
| XM_014198068.1 | -3.26            | 3.91E-02 | LOC106603863 | syntaxin-11-like                                                                   |
| XLOC_005326    | -5.30            | 3.93E-02 | XLOC_005326  | na                                                                                 |
| XLOC_067368    | 3.87             | 4.02E-02 | XLOC_067368  | na                                                                                 |
| XLOC_022690    | 5.77             | 4.07E-02 | XLOC_022690  | na                                                                                 |
| XM_014206976.1 | -0.77            | 4.09E-02 | ufsp1        | UFM1-specific peptidase 1 (non-functional)                                         |
| XLOC_016360    | -7.81            | 4.09E-02 | XLOC_016360  | na                                                                                 |
| XM_014139260.1 | 1.40             | 4.11E-02 | LOC106568695 | probable G-protein coupled receptor 158                                            |
| XLOC_083835    | 11.93            | 4.15E-02 | XLOC_083835  | na                                                                                 |
| XM_014205335.1 | -2.70            | 4.17E-02 | LOC106607875 | tumor necrosis factor receptor superfamily member 21-like                          |
| XM_014129398.1 | 1.68             | 4.26E-02 | LOC106563640 | putative defense protein Hdd11                                                     |
| XM_014195313.1 | -2.73            | 4.47E-02 | LOC106602593 | sodium/potassium/calcium exchanger 2-like2C transcript variant X1                  |
| XLOC_055448    | 2.47             | 4.48E-02 | XLOC_055448  | na                                                                                 |
| XM_014177758.1 | 1.99             | 4.78E-02 | LOC106588601 | mucin-5AC-like                                                                     |
| XLOC_063470    | 1.34             | 4.98E-02 | XLOC_063470  | na                                                                                 |

**Table S4.** Differentially expressed genes in fish subject to chronic stress compared to the control group (FDR <0.05). Shading indicates up (red) or down (green) regulation.

| Accession      | Log2 Fold Change | FDR      | Gene name    | Gene description                                                            |
|----------------|------------------|----------|--------------|-----------------------------------------------------------------------------|
| XLOC_057717    | -29.17           | 0.00E+00 | XLOC_057717  | na                                                                          |
| XM_014124956.1 | 5.54             | 3.89E-08 | LOC106561235 | gastricsin-like 2C transcript variant X1                                    |
| XM_014147385.1 | 4.90             | 3.89E-08 | LOC106572851 | pepsin A-like                                                               |
| XM_014124958.1 | 6.12             | 5.58E-07 | LOC106561236 | gastricsin-like                                                             |
| XLOC_042823    | 2.93             | 7.18E-07 | XLOC_042823  | na                                                                          |
| XLOC_049505    | 4.18             | 1.91E-06 | XLOC_049505  | na                                                                          |
| XR_001329667.1 | -5.58            | 6.59E-06 | LOC106609253 | uncharacterized LOC106609253                                                |
| XM_014166867.1 | 5.47             | 7.19E-06 | LOC106583076 | pepsin A-like 2C transcript variant X1                                      |
| XM_014208287.1 | 3.50             | 1.04E-05 | LOC106609441 | hemicentin-1-like                                                           |
| XLOC_000030    | 1.49             | 3.39E-03 | XLOC_000030  | na                                                                          |
| NM_001279140.1 | 1.99             | 5.02E-03 | igfbp-1a1    | insulin-like growth factor binding protein 1 paralog A1                     |
| XM_014131771.1 | 6.79             | 5.02E-03 | LOC106565088 | acidic mammalian chitinase-like                                             |
| XM_014132502.1 | 0.93             | 5.02E-03 | LOC106565406 | nuclear receptor subfamily 4 group A member 1-like 2C transcript variant X1 |
| XM_014146514.1 | 1.01             | 5.02E-03 | LOC106572395 | F-box only protein 6-like 2C transcript variant X1                          |
| XM_014149916.1 | 2.22             | 5.02E-03 | LOC106574225 | four and a half LIM domains protein 2-like 2C transcript variant X1         |
| XM_014160844.1 | 1.25             | 5.02E-03 | LOC106580132 | uncharacterized LOC106580132                                                |
| XM_014162186.1 | 1.30             | 5.02E-03 | LOC106580780 | smoothelin-like protein 2                                                   |
| XM_014171431.1 | 1.42             | 5.02E-03 | LOC106585340 | immediate early response gene 5-like protein                                |
| XR_001328272.1 | 3.72             | 5.02E-03 | LOC106602674 | uncharacterized LOC106602674                                                |
| XM_014201340.1 | 4.49             | 5.02E-03 | LOC106605555 | cornifelin homolog                                                          |
| NM_001141877.1 | 1.31             | 5.02E-03 | sc61g        | transport protein Sec61 subunit gamma                                       |
| XLOC_001214    | 1.63             | 5.02E-03 | XLOC_001214  | na                                                                          |
| XLOC_005379    | 1.81             | 5.02E-03 | XLOC_005379  | na                                                                          |
| XLOC_033969    | 1.54             | 5.02E-03 | XLOC_033969  | na                                                                          |
| XM_014200905.1 | 1.84             | 5.96E-03 | LOC106605369 | uncharacterized LOC106605369 2C transcript variant X1                       |
| XM_014140363.1 | 1.39             | 6.15E-03 | LOC106569220 | protein transport protein Sec61 subunit gamma-like 2C transcript variant X1 |
| XR_001320676.1 | 1.69             | 6.21E-03 | LOC106570462 | uncharacterized LOC106570462                                                |
| XLOC_009411    | 1.25             | 1.31E-02 | XLOC_009411  | na                                                                          |
| XM_014195962.1 | 1.50             | 2.13E-02 | LOC106602938 | NADH dehydrogenase [ubiquinone] 1 alpha subcomplex subunit 2-like           |
| NM_001141530.2 | -1.19            | 2.38E-02 | itl1a        | Intelectin-1a                                                               |
| XLOC_093138    | 1.25             | 2.49E-02 | XLOC_093138  | na                                                                          |
| XR_001319213.1 | 1.76             | 2.88E-02 | LOC106563242 | uncharacterized LOC106563242                                                |
| XM_014212854.1 | 0.89             | 3.02E-02 | hprt1        | hypoxanthine phosphoribosyltransferase 1 2C transcript variant X1           |
| XM_014173392.1 | 1.56             | 3.02E-02 | LOC100137092 | dopachrome tautomerase-like                                                 |
| XM_014126463.1 | -2.74            | 3.02E-02 | LOC106561968 | cathepsin L1-like                                                           |
| XM_014127049.1 | 1.89             | 3.02E-02 | LOC106562278 | dysbindin domain-containing protein 1-like 2C transcript variant X1         |
| XM_014139157.1 | -0.84            | 3.02E-02 | LOC106568655 | erythroferrone-like                                                         |
| XM_014141306.1 | 1.64             | 3.02E-02 | LOC106569732 | collagen alpha-1(VI) chain-like                                             |
| XM_014178515.1 | 0.94             | 3.02E-02 | LOC106588942 | tissue factor pathway inhibitor 2-like                                      |
| XM_014183729.1 | -0.72            | 3.02E-02 | LOC106592390 | E3 ubiquitin-protein ligase TRIM39-like                                     |
| XM_014193844.1 | -0.54            | 3.02E-02 | LOC106601548 | uncharacterized LOC106601548 2C transcript variant X1                       |
| NM_001123607.1 | 1.88             | 3.02E-02 | mrf4         | myogenic regulatory factor 4                                                |
| XLOC_000028    | 1.59             | 3.02E-02 | XLOC_000028  | na                                                                          |
| XLOC_041258    | 1.60             | 3.02E-02 | XLOC_041258  | na                                                                          |
| XM_014204439.1 | 1.39             | 3.10E-02 | LOC106607463 | interferon a3-like 2C transcript variant X1                                 |
| XLOC_073991    | -1.04            | 3.10E-02 | XLOC_073991  | na                                                                          |
| NM_001139619.1 | 1.09             | 3.47E-02 | eif4e1a      | eukaryotic translation initiation factor 4e 1a                              |
| NM_001140868.1 | 1.37             | 3.56E-02 | cf125        | CF125 protein                                                               |
| NM_001141156.1 | 0.86             | 3.56E-02 | hint1        | histidine triad nucleotide binding protein 1                                |
| XM_014124782.1 | 1.32             | 3.56E-02 | hrsp12       | heat-responsive protein 12                                                  |
| XM_014126616.1 | 1.18             | 3.56E-02 | LOC106562066 | trafficking protein particle complex subunit 2-like protein                 |



|                |       |          |              |                                                                              |
|----------------|-------|----------|--------------|------------------------------------------------------------------------------|
| XR_001319149.1 | 1.14  | 3.56E-02 | LOC106562957 | uncharacterized LOC106562957 2C transcript variant X1                        |
| XM_014131619.1 | 1.34  | 3.56E-02 | LOC106565035 | cytochrome c oxidase subunit 6C-1 2C transcript variant X1                   |
| XM_014131770.1 | 6.84  | 3.56E-02 | LOC106565087 | acidic mammalian chitinase-like                                              |
| XM_014135804.1 | 0.80  | 3.56E-02 | LOC106567025 | translocon-associated protein subunit delta-like                             |
| XM_014137127.1 | 1.07  | 3.56E-02 | LOC106567624 | exocyst complex component 3-like                                             |
| XM_014138035.1 | 1.23  | 3.56E-02 | LOC106568029 | 60S ribosomal protein L36a-like                                              |
| XM_014143322.1 | 1.36  | 3.56E-02 | LOC106570789 | DNA-directed RNA polymerases I 2C II 2C and III subunit RPABC4-like 2C       |
| XM_014144577.1 | 1.13  | 3.56E-02 | LOC106571451 | signal recognition particle 9 kDa protein-like                               |
| XR_001320980.1 | 1.94  | 3.56E-02 | LOC106571698 | uncharacterized LOC106571698                                                 |
| XM_014156332.1 | 1.54  | 3.56E-02 | LOC106577897 | plasminogen activator inhibitor 1-like                                       |
| XR_001322807.1 | 1.34  | 3.56E-02 | LOC106580131 | uncharacterized LOC106580131                                                 |
| XM_014162429.1 | 0.89  | 3.56E-02 | LOC106580897 | uncharacterized LOC106580897                                                 |
| XM_014169453.1 | 1.23  | 3.56E-02 | LOC106584322 | torsin-3A-like 2C transcript variant X1                                      |
| XM_014176091.1 | 1.04  | 3.56E-02 | LOC106587574 | nuclear envelope phosphatase-regulatory subunit 1 2C transcript variant X1   |
| XM_014176111.1 | 1.33  | 3.56E-02 | LOC106587582 | SS18-like protein 2                                                          |
| XM_014177694.1 | 0.71  | 3.56E-02 | LOC106588561 | DNA-directed RNA polymerase III subunit RPC7-like                            |
| XM_014183834.1 | 1.94  | 3.56E-02 | LOC106592479 | DNA damage-inducible transcript 4 protein-like                               |
| XM_014185875.1 | 1.22  | 3.56E-02 | LOC106594505 | troponin I 2C fast skeletal muscle-like                                      |
| XM_014186156.1 | 1.04  | 3.56E-02 | LOC106594764 | zinc finger protein 658B-like                                                |
| XM_014192782.1 | -1.07 | 3.56E-02 | LOC106600973 | beta-1 2C4-mannosyl-glycoprotein 4-beta-N-acetylglucosaminyltransferase-like |
| XM_014193023.1 | -0.54 | 3.56E-02 | LOC106601099 | myoferlin-like                                                               |
| XM_014194484.1 | 1.53  | 3.56E-02 | LOC106602033 | cofilin-2-like                                                               |
| XM_014196358.1 | 1.04  | 3.56E-02 | LOC106603114 | LRRN4 C-terminal-like protein 2C transcript variant X1                       |
| XM_014204008.1 | 1.71  | 3.56E-02 | LOC106607240 | transmembrane protein 98-like 2C transcript variant X1                       |
| XM_014210981.1 | 1.57  | 3.56E-02 | LOC106611115 | intron-binding protein aquarius-like                                         |
| XM_014211770.1 | 1.26  | 3.56E-02 | LOC106611504 | 60S ribosomal protein L36a-like                                              |
| XM_014212334.1 | 1.00  | 3.56E-02 | LOC106611775 | short coiled-coil protein B-like 2C transcript variant X1                    |
| NM_001140861.2 | 1.39  | 3.56E-02 | scam4        | Secretory carrier-associated membrane protein 4                              |
| XLOC_000027    | 1.56  | 3.56E-02 | XLOC_000027  | na                                                                           |
| XLOC_042919    | 1.99  | 3.56E-02 | XLOC_042919  | na                                                                           |
| XLOC_075460    | 1.04  | 3.56E-02 | XLOC_075460  | na                                                                           |
| NM_001141187.1 | 0.94  | 3.56E-02 | ykt6         | YKT6 v-SNARE homolog (S. cerevisiae)                                         |
| XM_014191134.1 | 0.80  | 3.68E-02 | ube2v2       | ubiquitin-conjugating enzyme E2 variant 2 2C transcript variant X1           |
| XR_001322400.1 | 1.21  | 3.86E-02 | LOC106578263 | uncharacterized LOC106578263                                                 |
| XM_014181663.1 | 1.32  | 3.86E-02 | LOC106590555 | protein transport protein Sec61 subunit gamma 2C transcript variant X1       |
| XR_001325958.1 | 1.34  | 3.86E-02 | LOC106593774 | uncharacterized LOC106593774                                                 |
| XLOC_064668    | 1.01  | 3.86E-02 | XLOC_064668  | na                                                                           |
| XLOC_035802    | 1.26  | 3.90E-02 | XLOC_035802  | na                                                                           |
| XM_014192152.1 | 0.82  | 4.03E-02 | fam173a      | family with sequence similarity 173 2C member A 2C transcript variant X1     |
| XM_014127899.1 | 1.96  | 4.03E-02 | gatm         | glycine amidinotransferase (L-arginine:glycine amidinotransferase)           |
| XM_014147886.1 | 0.80  | 4.03E-02 | LOC106573170 | protein C19orf12 homolog 2C transcript variant X1                            |
| XM_014155116.1 | 1.88  | 4.03E-02 | LOC106577211 | DNA damage-inducible transcript 4 protein-like                               |
| XM_014157473.1 | 2.34  | 4.03E-02 | LOC106578540 | cAMP-responsive element modulator-like 2C transcript variant X1              |
| XR_001325901.1 | 1.33  | 4.03E-02 | LOC106593518 | uncharacterized LOC106593518                                                 |
| NM_001141193.2 | 0.87  | 4.03E-02 | pigy         | phosphatidylinositol glycan anchor biosynthesis 2C class Y                   |
| NM_001139699.1 | 1.57  | 4.03E-02 | ppdpf        | c20orf149 protein                                                            |
| XM_014206938.1 | 1.32  | 4.03E-02 | tyrp-1b      | tyrosinase-related protein 1b                                                |
| NM_001279145.1 | 1.27  | 4.16E-02 | igfbp-6a2    | insulin-like growth factor binding protein 6 paralog A2                      |
| NM_001139734.1 | 1.13  | 4.16E-02 | LOC100194650 | ribosomal protein L36a-2                                                     |
| XM_014124215.1 | 1.47  | 4.16E-02 | LOC106560846 | leucine-rich repeat-containing protein 20-like                               |
| XR_001319428.1 | -3.04 | 4.16E-02 | LOC106564200 | uncharacterized LOC106564200                                                 |
| XM_014137047.1 | 0.73  | 4.16E-02 | LOC106567574 | ubiquitin carboxyl-terminal hydrolase 2-like 2C transcript variant X1        |
| XM_014138326.1 | 1.21  | 4.16E-02 | LOC106568198 | cytochrome b-c1 complex subunit 9-like                                       |
| XM_014141876.1 | 1.19  | 4.16E-02 | LOC106570015 | NADH dehydrogenase [ubiquinone] iron-sulfur protein 5-like                   |
| XM_014142851.1 | 1.29  | 4.16E-02 | LOC106570471 | 26S proteasome complex subunit DSS1-like                                     |
| XM_014148796.1 | 0.79  | 4.16E-02 | LOC106573605 | serine/threonine-protein kinase STK11-like 2C transcript variant X1          |

|                |       |          |              |                                                                                           |
|----------------|-------|----------|--------------|-------------------------------------------------------------------------------------------|
| XM_014150737.1 | 1.34  | 4.16E-02 | LOC106574722 | small integral membrane protein 11-like                                                   |
| XM_014152748.1 | 1.14  | 4.16E-02 | LOC106575974 | protein S100-A1-like 2C transcript variant X1                                             |
| XM_014156134.1 | 0.92  | 4.16E-02 | LOC106577792 | 39S ribosomal protein L52 2C mitochondrial-like 2C transcript variant X1                  |
| XM_014160435.1 | 1.02  | 4.16E-02 | LOC106579969 | prostaglandin E synthase 2-like 2C transcript variant X1                                  |
| XM_014166227.1 | 0.98  | 4.16E-02 | LOC106582796 | tumor suppressor candidate 2-like 2C transcript variant X1                                |
| XM_014167009.1 | 0.91  | 4.16E-02 | LOC106583154 | musculoskeletal embryonic nuclear protein 1-like                                          |
| XR_001324158.1 | 1.18  | 4.16E-02 | LOC106586240 | uncharacterized LOC106586240                                                              |
| XM_014175164.1 | 1.05  | 4.16E-02 | LOC106587124 | CD59 glycoprotein-like 2C transcript variant X1                                           |
| XM_014176249.1 | 1.08  | 4.16E-02 | LOC106587662 | probable G-protein coupled receptor 158 2C transcript variant X1                          |
| XM_014176405.1 | 1.17  | 4.16E-02 | LOC106587763 | solute carrier family 22 member 18-like                                                   |
| XM_014178257.1 | 1.09  | 4.16E-02 | LOC106588813 | fatty acid-binding protein 2C heart-like                                                  |
| XM_014178836.1 | 1.35  | 4.16E-02 | LOC106589133 | 60S ribosomal protein L30 2C transcript variant X1                                        |
| XR_001326794.1 | 1.17  | 4.16E-02 | LOC106596919 | uncharacterized LOC106596919                                                              |
| XR_001328811.1 | 1.41  | 4.16E-02 | LOC106605220 | uncharacterized LOC106605220                                                              |
| XR_001329073.1 | 1.35  | 4.16E-02 | LOC106606515 | uncharacterized LOC106606515                                                              |
| XR_001329867.1 | 1.50  | 4.16E-02 | LOC106610188 | uncharacterized LOC106610188                                                              |
| XR_001329944.1 | 1.00  | 4.16E-02 | LOC106610644 | uncharacterized LOC106610644                                                              |
| XM_014211819.1 | 1.95  | 4.16E-02 | LOC106611527 | plasticin-like                                                                            |
| XM_014212895.1 | 0.85  | 4.16E-02 | LOC106612073 | tRNA 2'-phosphotransferase 1-like                                                         |
| XM_014137968.1 | 0.91  | 4.16E-02 | mrpl22       | mitochondrial ribosomal protein L22 2C transcript variant X1                              |
| XM_014203712.1 | 1.27  | 4.16E-02 | ndufa6       | NADH dehydrogenase (ubiquinone) 1 alpha subcomplex 2C 6 2C 14kDa                          |
| XM_014125583.1 | -0.38 | 4.16E-02 | papd5        | PAP associated domain containing 5 2C transcript variant X1                               |
| NM_001141852.1 | 1.41  | 4.16E-02 | pcbd2        | pterin-4 alpha-carbinolamine dehydratase cofactor of hepatocyte factor 1                  |
| XM_014167247.1 | 1.37  | 4.16E-02 | pmel         | premelanosome protein                                                                     |
| XM_014178471.1 | 1.07  | 4.16E-02 | shfm1        | split hand/foot malformation (ectrodactyly) type 1                                        |
| XM_014204948.1 | 1.18  | 4.16E-02 | smim8        | small integral membrane protein 8                                                         |
| XLOC_000029    | 1.44  | 4.16E-02 | XLOC_000029  | na                                                                                        |
| XLOC_019764    | 1.02  | 4.16E-02 | XLOC_019764  | na                                                                                        |
| XLOC_060760    | 1.19  | 4.16E-02 | XLOC_060760  | na                                                                                        |
| NM_001140614.1 | 1.15  | 4.16E-02 | znf593       | zinc finger protein 593                                                                   |
| NM_001146400.1 | 1.15  | 4.26E-02 | acot13       | acyl-CoA thioesterase 13                                                                  |
| NM_001141403.1 | 1.63  | 4.26E-02 | bag2         | BCL2-associated athanogene 2                                                              |
| NM_001140872.1 | 1.43  | 4.26E-02 | cmc4         | C-x(9)-C motif containing 4                                                               |
| NM_001252357.1 | 1.11  | 4.26E-02 | dad1         | defender against cell death 1                                                             |
| XM_014142573.1 | 0.83  | 4.26E-02 | fpgs         | folypolyglutamate synthase 2C transcript variant X1                                       |
| NM_001141352.1 | 0.59  | 4.26E-02 | hlx          | H2.0-like homeobox protein                                                                |
| NM_001141159.2 | 1.09  | 4.26E-02 | leg          | Beta-galactoside-binding lectin                                                           |
| XR_001319276.1 | 1.51  | 4.26E-02 | LOC106563557 | uncharacterized LOC106563557                                                              |
| XR_001319318.1 | 1.08  | 4.26E-02 | LOC106563787 | uncharacterized LOC106563787                                                              |
| XM_014130190.1 | 0.60  | 4.26E-02 | LOC106564164 | zinc finger protein 501-like                                                              |
| XM_014140307.1 | 0.91  | 4.26E-02 | LOC106569195 | U6 snRNA-associated Sm-like protein LSm1 2C transcript variant X1                         |
| XM_014143450.1 | 2.09  | 4.26E-02 | LOC106570884 | perforin-1-like                                                                           |
| XM_014148711.1 | 1.11  | 4.26E-02 | LOC106573564 | mitochondrial import inner membrane translocase subunit Tim13                             |
| XM_014152166.1 | 1.40  | 4.26E-02 | LOC106575576 | small integral membrane protein 11-like                                                   |
| XM_014153767.1 | 0.82  | 4.26E-02 | LOC106576547 | dnaj homolog subfamily C member 2-like                                                    |
| XR_001322942.1 | 2.38  | 4.26E-02 | LOC106580674 | uncharacterized LOC106580674 2C transcript variant X1                                     |
| XM_014184745.1 | -1.98 | 4.26E-02 | LOC106593408 | myosin heavy chain 2C fast skeletal muscle-like                                           |
| XM_014189389.1 | 2.40  | 4.26E-02 | LOC106598344 | apolipoprotein D-like 2C transcript variant X1                                            |
| XM_014190321.1 | 1.18  | 4.26E-02 | LOC106599203 | tissue factor-like 2C transcript variant X1                                               |
| XM_014191583.1 | 0.97  | 4.26E-02 | LOC106600265 | NEDD8-like                                                                                |
| XM_014192600.1 | 1.61  | 4.26E-02 | LOC106600870 | myosin light chain 4-like                                                                 |
| XR_001328026.1 | 1.15  | 4.26E-02 | LOC106601549 | uncharacterized LOC106601549                                                              |
| XM_014203443.1 | 0.97  | 4.26E-02 | LOC106606948 | transmembrane protein 100-like                                                            |
| XM_014136451.1 | 1.19  | 4.26E-02 | tnfrsf6b     | tumor necrosis factor receptor superfamily 2C member 6b 2C decoy 2C transcript variant X1 |
| XLOC_044742    | 0.99  | 4.26E-02 | XLOC_044742  | na                                                                                        |

|                |       |          |               |                                                                                                |
|----------------|-------|----------|---------------|------------------------------------------------------------------------------------------------|
| XLOC_050577    | 0.78  | 4.26E-02 | XLOC_050577   | na                                                                                             |
| XLOC_051847    | 1.42  | 4.26E-02 | XLOC_051847   | na                                                                                             |
| XLOC_055978    | 1.02  | 4.26E-02 | XLOC_055978   | na                                                                                             |
| NM_001140335.1 | 0.86  | 4.27E-02 | chac1         | ChaC 2C cation transport regulator-like 1                                                      |
| XM_014159173.1 | 1.73  | 4.27E-02 | LOC106579339  | putative protein PTGES3L                                                                       |
| XM_014166913.1 | 1.00  | 4.27E-02 | LOC106583097  | MICOS complex subunit Mic10-like                                                               |
| XM_014202763.1 | 1.90  | 4.27E-02 | LOC106606507  | transmembrane protein 100-like                                                                 |
| XM_014207454.1 | 1.04  | 4.27E-02 | LOC106609071  | oligosaccharyltransferase complex subunit ostc 2C transcript variant X1                        |
| XM_014212538.1 | 1.06  | 4.27E-02 | LOC106611894  | zinc finger protein 782-like                                                                   |
| NM_001141804.1 | 0.67  | 4.27E-02 | prosc         | proline synthetase co-transcribed homolog (bacterial)                                          |
| NM_001140810.1 | 1.14  | 4.29E-02 | pfdn5         | prefoldin subunit 5                                                                            |
| NM_001123601.1 | 1.32  | 4.35E-02 | myod1c        | myoblast determination protein 1c                                                              |
| XR_001318997.1 | 1.19  | 4.38E-02 | LOC106562222  | uncharacterized LOC106562222                                                                   |
| XM_014215517.1 | 0.84  | 4.38E-02 | LOC106613363  | intraflagellar transport protein 20 homolog                                                    |
| XM_014165878.1 | 0.52  | 4.44E-02 | LOC106582633  | bladder cancer-associated protein                                                              |
| NM_001165346.1 | 0.68  | 4.54E-02 | eglN2         | Egl nine homolog 2                                                                             |
| XM_014152959.1 | 1.06  | 4.54E-02 | LOC106576080  | cytochrome c oxidase assembly factor 6 homolog 2C transcript variant X1                        |
| XM_014180972.1 | 1.26  | 4.55E-02 | cssa29h8orf59 | chromosome ssa29 open reading frame 2C human C8orf59                                           |
| XM_014126951.1 | 1.11  | 4.55E-02 | LOC106562224  | probable ribosome biogenesis protein RLP24                                                     |
| XM_014183303.1 | 1.00  | 4.55E-02 | LOC106592004  | UPF0390 protein zgc136864-like                                                                 |
| XR_001328547.1 | 1.00  | 4.55E-02 | LOC106603962  | uncharacterized LOC106603962 2C transcript variant X1                                          |
| XM_014198652.1 | 1.02  | 4.55E-02 | LOC106604209  | ATP synthase subunit O 2C mitochondrial-like 2C transcript variant X1                          |
| XLOC_039816    | 0.56  | 4.55E-02 | XLOC_039816   | na                                                                                             |
| XM_014177637.1 | -6.41 | 4.57E-02 | LOC106588522  | mucin-2-like                                                                                   |
| XM_014172709.1 | 1.66  | 4.59E-02 | hspb3         | heat shock 27kDa protein 3                                                                     |
| XM_014166242.1 | 0.85  | 4.59E-02 | LOC106582802  | T-cell leukemia translocation-altered gene protein homolog 2C variant X1                       |
| XM_014169343.1 | 0.64  | 4.61E-02 | LOC106584278  | peroxiredoxin-6-like 2C transcript variant X1                                                  |
| XR_001320979.1 | 1.12  | 4.61E-02 | LOC106571693  | uncharacterized LOC106571693                                                                   |
| XM_014154124.1 | 0.95  | 4.66E-02 | LOC106576751  | glutathione S-transferase kappa 1-like 2C transcript variant X1                                |
| XM_014168196.1 | 1.12  | 4.68E-02 | LOC106583697  | cytochrome c oxidase assembly protein COX14 homolog 2C transcript variant X1                   |
| XM_014134839.1 | 1.22  | 4.75E-02 | mrps25        | mitochondrial ribosomal protein S25                                                            |
| XM_014122877.1 | 0.92  | 4.79E-02 | LOC106560233  | uncharacterized LOC106560233 2C transcript variant X1                                          |
| XM_014170114.1 | 1.13  | 4.79E-02 | LOC106584630  | ubiquitin-60S ribosomal protein L40                                                            |
| XM_014205335.1 | -3.26 | 4.79E-02 | LOC106607875  | tumor necrosis factor receptor superfamily member 21-like                                      |
| XM_014206408.1 | -0.83 | 4.85E-02 | LOC106608479  | putative transcription factor Ovo-like 1                                                       |
| NM_001140361.1 | 0.48  | 4.91E-02 | if4ea         | Eukaryotic translation initiation factor 4E-1A                                                 |
| XM_014166598.1 | 1.26  | 4.91E-02 | LOC106582956  | 28S ribosomal protein S16 2C mitochondrial-like                                                |
| XM_014179703.1 | 0.69  | 4.91E-02 | LOC106589571  | ATP synthase mitochondrial F1 complex assembly factor 2-like 2C transcript variant X1          |
| XM_014204144.1 | 0.95  | 4.91E-02 | LOC106607307  | coiled-coil domain-containing protein 43-like                                                  |
| XM_014204227.1 | 0.54  | 4.91E-02 | LOC106607342  | lipopolysaccharide-induced tumor necrosis factor-alpha factor homolog 2C transcript variant X1 |
| NM_001139600.1 | 1.22  | 4.91E-02 | rps29         | ribosomal protein S29                                                                          |
| NM_001141313.1 | 2.18  | 4.91E-02 | tnni1         | troponin I 2C slow skeletal muscle                                                             |
| NM_001252352.1 | 0.60  | 4.91E-02 | xbp1          | X-box binding protein 1                                                                        |

**Table S5.** Selected differentially expressed genes with known immune function following 24h exposure to LPS (20 µg/ml) in control (non-stressed) fish. In total, 25,469 genes were differentially regulated (FDR <0.05) by LPS exposure. Shading indicates up (red) or down (green) regulation.

| Accession      | Log2 Fold Change | FDR      | Gene name    | Gene description                                                       |
|----------------|------------------|----------|--------------|------------------------------------------------------------------------|
| NM_001141110.1 | -2.88            | 3.61E-15 | nkl          | Antimicrobial peptide NK-lysin                                         |
| XM_014129907.1 | -4.54            | 1.23E-04 | LOC106563926 | antimicrobial peptide NK-lysin-like                                    |
| XM_014207836.1 | 1.26             | 5.11E-19 | LOC106609252 | apoptosis facilitator Bcl-2-like protein 14_2C transcript variant X1   |
| XM_014148534.1 | -3.33            | 2.94E-03 | LOC106573461 | apoptosis-associated speck-like protein containing a CARD              |
| XM_014185593.1 | -1.07            | 1.00E-04 | LOC106594220 | apoptosis-inducing factor 1_2C mitochondrial-like                      |
| NM_001141505.1 | -1.23            | 8.01E-07 | apitd1       | apoptosis-inducing_2C TAF9-like domain 1                               |
| XM_014211146.1 | 1.09             | 1.44E-05 | LOC106611188 | apoptosis-stimulating of p53 protein 1-like_2C transcript variant X1   |
| XM_014187907.1 | -3.52            | 6.73E-09 | LOC106596637 | B-cell antigen receptor complex-associated protein alpha chain-like_2C |
| XM_014155916.1 | -1.35            | 8.30E-12 | LOC106577630 | B-cell CLL/lymphoma 6 member B protein-like_2C transcript variant X1   |
| XM_014171355.1 | 2.36             | 8.69E-04 | LOC106585288 | B-cell CLL/lymphoma 7 protein family member A-like                     |
| XM_014155482.1 | 1.51             | 3.01E-11 | LOC106577470 | B-cell lymphoma 3 protein-like_2C transcript variant X1                |
| XM_014206088.1 | 4.25             | 5.22E-09 | LOC106608246 | B-cell lymphoma/leukemia 11B-like_2C transcript variant X1             |
| XM_014157075.1 | 4.29             | 6.98E-03 | LOC106578359 | B-cell receptor CD22-like_2C transcript variant X1                     |
| XM_014187472.1 | -1.58            | 3.79E-13 | LOC106596153 | CASP8 and FADD-like apoptosis regulator                                |
| XM_014203779.1 | 1.03             | 4.17E-11 | LOC106607148 | caspase recruitment domain-containing protein 10-like                  |
| XM_014214559.1 | -1.08            | 1.78E-12 | LOC106612902 | caspase-1-like                                                         |
| XM_014137997.1 | 2.98             | 3.19E-45 | LOC106568012 | caspase-3-like                                                         |
| XM_014160142.1 | -1.51            | 3.87E-08 | LOC106579851 | C-C chemokine receptor type 4-like                                     |
| XM_014160129.1 | -1.26            | 4.73E-07 | LOC106579844 | C-C chemokine receptor type 5-like                                     |
| XM_014160242.1 | -1.18            | 2.86E-07 | LOC106579893 | C-C chemokine receptor type 5-like_2C transcript variant X1            |
| XM_014176636.1 | -1.21            | 1.64E-03 | LOC106587975 | C-C motif chemokine 13-like                                            |
| XM_014128861.1 | -1.99            | 5.01E-11 | LOC106563358 | C-C motif chemokine 19-like                                            |
| XM_014141244.1 | 2.73             | 1.84E-23 | LOC106569680 | C-C motif chemokine 20-like                                            |
| NM_001141267.2 | -1.24            | 9.46E-07 | ccl21        | C-C motif chemokine 21                                                 |
| XM_014172601.1 | -1.49            | 2.47E-05 | LOC106585882 | C-C motif chemokine 4-like                                             |
| XM_014124357.1 | -1.15            | 7.00E-04 | LOC106560915 | C-C motif chemokine 8-like                                             |
| XM_014149455.1 | 1.54             | 2.87E-03 | LOC106573945 | CD109 antigen-like                                                     |
| XM_014209668.1 | -2.93            | 1.61E-14 | LOC106610349 | CD209 antigen-like protein E                                           |
| XM_014168155.1 | 2.33             | 7.30E-09 | LOC106583660 | CD276 antigen-like                                                     |
| XM_014175885.1 | 1.60             | 4.39E-04 | LOC106587471 | CD81 antigen-like                                                      |
| XM_014147496.1 | 1.09             | 2.03E-03 | LOC106572911 | CD82 antigen-like                                                      |
| XM_014163256.1 | 1.29             | 1.16E-04 | LOC106581291 | CD83 antigen-like                                                      |
| XM_014187383.1 | -1.82            | 1.48E-03 | LOC106596062 | chemokine XC receptor 1-like                                           |
| XM_014156674.1 | 1.08             | 2.19E-08 | LOC106578085 | chemokine-like receptor 1                                              |
| XM_014186332.1 | 6.97             | 5.23E-04 | LOC106594945 | C-myc promoter-binding protein-like                                    |
| XM_014178639.1 | -1.16            | 1.01E-05 | LOC106589014 | C-Myc-binding protein-like_2C transcript variant X1                    |
| XM_014148242.1 | 1.86             | 2.45E-05 | LOC106573304 | complement C1q tumor necrosis factor-related protein 4-like            |
| XM_014143850.1 | -6.04            | 7.38E-03 | LOC106571137 | complement C1q-like protein 2                                          |
| XM_014162291.1 | 2.07             | 5.40E-03 | LOC106580826 | complement C2-like                                                     |
| XM_014189274.1 | 1.13             | 1.37E-04 | LOC106598222 | complement C4-like                                                     |
| NM_001140784.1 | 5.82             | 1.10E-14 | c1q12        | complement component 1_2C q subcomponent-like 2                        |
| NM_001146430.1 | -2.36            | 5.41E-03 | c8g          | complement component 8_2C gamma polypeptide                            |
| XM_014134762.1 | 1.79             | 9.62E-15 | LOC106566600 | complement component C7-like                                           |
| XM_014169804.1 | -1.07            | 1.83E-07 | LOC106584449 | complement factor D-like                                               |
| NM_001140872.1 | -1.09            | 1.02E-03 | cmc4         | C-x(9)-C motif containing 4                                            |
| XM_014152244.1 | 3.15             | 2.21E-07 | LOC106575635 | C-X-C chemokine receptor type 1-like                                   |
| XM_014152259.1 | 4.73             | 2.40E-08 | LOC106575644 | C-X-C chemokine receptor type 2-like                                   |
| XM_014157979.1 | -1.01            | 4.30E-05 | LOC106578808 | C-X-C chemokine receptor type 3-like_2C transcript variant X1          |
| XM_014164248.1 | 1.54             | 2.10E-15 | LOC106581841 | C-X-C chemokine receptor type 4-like                                   |
| NM_001141028.1 | -1.55            | 3.24E-07 | cx10         | C-X-C motif chemokine 10                                               |

|                |       |          |              |                                                                    |
|----------------|-------|----------|--------------|--------------------------------------------------------------------|
| XM_014131006.1 | 1.61  | 4.38E-08 | LOC106564720 | C-X-C motif chemokine 11-like                                      |
| XM_014172589.1 | -2.06 | 3.76E-04 | LOC106585872 | C-X-C motif chemokine 13-like                                      |
| XM_014205326.1 | -1.12 | 9.64E-03 | LOC106607873 | C-X-C motif chemokine 13-like_2C transcript variant X1             |
| NM_001140825.1 | 1.35  | 7.36E-03 | cx14         | C-X-C motif chemokine 14                                           |
| XM_014150420.1 | 1.88  | 3.32E-29 | LOC106574504 | cytokine receptor-like factor 1                                    |
| XM_014151881.1 | 1.05  | 5.57E-07 | LOC106575381 | cytokine receptor-like factor 1_2C transcript variant X1           |
| XM_014143589.1 | 1.91  | 6.16E-04 | LOC106570976 | death-associated protein kinase 3-like                             |
| XM_014155116.1 | -1.23 | 3.34E-03 | LOC106577211 | DNA damage-inducible transcript 4 protein-like                     |
| XM_014212990.1 | 1.23  | 5.51E-09 | LOC106612111 | DNA damage-inducible transcript 4-like protein_2C                  |
| XM_014158346.1 | -1.11 | 3.73E-13 | dnajc9       | DnaJ (Hsp40) homolog_2C subfamily C_2C member 9_2C                 |
| XM_014168282.1 | 2.55  | 3.54E-07 | LOC106583738 | dnaJ homolog subfamily B member 12-like                            |
| XM_014161119.1 | -1.36 | 5.48E-05 | LOC106580287 | dnaJ homolog subfamily B member 5-like_2C transcript variant X1    |
| XM_014129653.1 | -2.54 | 2.03E-03 | LOC106563796 | dnaJ homolog subfamily C member 3-like                             |
| XM_014158372.1 | 1.07  | 1.22E-06 | LOC106578994 | HEAT repeat-containing protein 1-like_2C transcript variant X1     |
| XM_014202722.1 | 5.84  | 6.76E-03 | LOC106606490 | heat shock 70 kDa protein 12A-like_2C transcript variant X1        |
| XM_014186568.1 | 1.32  | 9.43E-03 | LOC106595188 | heat shock 70 kDa protein 14-like                                  |
| XM_014192866.1 | 1.84  | 2.01E-06 | LOC106601018 | heat shock 70 kDa protein-like                                     |
| XM_014214839.1 | 1.53  | 5.35E-29 | LOC106613013 | heat shock cognate 70 kDa protein-like_2C transcript variant X1    |
| NM_001146651.1 | 1.48  | 6.19E-26 | hsp7c        | Heat shock cognate 71 kDa protein                                  |
| XM_014215074.1 | -5.73 | 1.40E-04 | LOC106613119 | heat shock protein beta-7-like                                     |
| NM_001146578.1 | -1.23 | 5.42E-06 | hspb11       | heat shock protein family B (small)_2C member 11                   |
| XM_014205881.1 | -1.63 | 2.01E-06 | LOC106608137 | heat shock protein HSP 90-alpha 1                                  |
| XM_014140001.1 | -1.15 | 3.44E-03 | LOC106569050 | immunoglobulin iota chain-like                                     |
| XM_014202524.1 | 1.72  | 5.56E-03 | LOC106606374 | immunoglobulin lambda-like polypeptide 1                           |
| XM_014126092.1 | -1.33 | 7.84E-03 | ighmbp2      | immunoglobulin mu binding protein 2                                |
| XM_014126795.1 | -1.34 | 5.25E-03 | LOC106562145 | immunoglobulin superfamily DCC subclass member 4-like_2C           |
| XM_014215398.1 | 1.10  | 2.13E-05 | LOC106613308 | immunoglobulin superfamily member 10-like                          |
| XM_014213999.1 | -1.87 | 1.31E-06 | LOC106612643 | immunoglobulin superfamily member 11-like_2C transcript variant X1 |
| XM_014175399.1 | -4.45 | 4.66E-04 | LOC106587223 | immunoglobulin superfamily member 1-like_2C transcript variant X1  |
| XM_014162937.1 | -2.62 | 9.39E-05 | LOC106581125 | immunoglobulin superfamily member 5-like                           |
| XM_014194077.1 | 1.00  | 4.94E-06 | LOC106601731 | immunoglobulin superfamily member 6-like                           |
| XM_014186408.1 | 1.06  | 4.18E-10 | LOC106595027 | immunoglobulin-like domain-containing receptor 1                   |
| XM_014151036.1 | 1.88  | 1.32E-03 | LOC106574905 | immunoglobulin-like domain-containing receptor 2                   |
| XM_014163747.1 | 4.62  | 9.12E-66 | irg1         | immunoresponsive 1 homolog (mouse)                                 |
| NM_001123558.1 | -1.27 | 9.95E-03 | ifng         | Interferon gamma                                                   |
| XM_014187639.1 | -2.04 | 2.45E-03 | LOC106596334 | interferon a3-like_2C transcript variant X1                        |
| NM_001123710.1 | -4.25 | 1.17E-05 | ifna1        | interferon alpha 1                                                 |
| NM_001252364.1 | -1.03 | 9.66E-08 | irf1-2       | interferon regulatory factor 1 isoform 2                           |
| XM_014162109.1 | 1.08  | 2.74E-03 | LOC106580746 | interferon regulatory factor 2-binding protein 1-like_2C           |
| XM_014145468.1 | -2.01 | 8.62E-16 | LOC106571913 | interferon regulatory factor 4-like_2C transcript variant X1       |
| XM_014133038.1 | 1.53  | 7.52E-15 | LOC106565674 | interferon regulatory factor 6-like_2C transcript variant X1       |
| XM_014165670.1 | -7.13 | 1.10E-06 | LOC106582502 | interferon-induced guanylate-binding protein 1-like                |
| NM_001140400.1 | -1.09 | 6.74E-10 | ifi44        | Interferon-induced protein 44                                      |
| XM_014151635.1 | -1.04 | 9.18E-03 | LOC106575246 | interferon-induced protein 44-like                                 |
| XM_014167589.1 | -1.51 | 1.98E-03 | LOC106583433 | interferon-induced protein 44-like_2C transcript variant X1        |
| XM_014154814.1 | -1.30 | 1.52E-04 | LOC106577091 | interferon-induced protein with tetratricopeptide repeats 1-like   |
| XM_014152521.1 | 2.94  | 1.11E-13 | il11         | interleukin 11_2C transcript variant X1                            |
| XM_014137694.1 | 1.26  | 4.40E-08 | il18bp       | interleukin 18 binding protein                                     |
| NM_001204895.1 | -1.05 | 6.09E-03 | il4/13a      | interleukin 4/13A                                                  |
| XM_014143360.1 | 2.94  | 2.47E-27 | LOC106570815 | interleukin-1 beta-like                                            |
| NM_001145420.1 | 3.03  | 4.10E-52 | il1r2        | interleukin-1 receptor type II                                     |
| XM_014153887.1 | 1.05  | 3.16E-06 | LOC106576643 | interleukin-1 receptor-associated kinase 3-like                    |
| XM_014201821.1 | 2.95  | 4.21E-18 | LOC106605846 | interleukin-11-like                                                |
| XM_014155985.1 | 2.05  | 5.73E-03 | LOC106577668 | interleukin-13 receptor subunit alpha-2-like                       |
| XM_014134958.1 | 2.87  | 6.45E-04 | LOC106566684 | interleukin-17 receptor B-like_2C transcript variant X1            |
| XM_014134418.1 | 1.31  | 7.25E-03 | LOC106566413 | interleukin-17 receptor D-like                                     |



|                |       |          |              |                                                                         |
|----------------|-------|----------|--------------|-------------------------------------------------------------------------|
| XM_014149154.1 | 2.02  | 8.83E-08 | LOC106573803 | interleukin-17C-like                                                    |
| XM_014152609.1 | -1.02 | 3.10E-03 | LOC106575893 | interleukin-18 receptor accessory protein-like_2C transcript variant X1 |
| XM_014127964.1 | 1.66  | 3.22E-03 | LOC106562893 | interleukin-6 receptor subunit beta-like_2C transcript variant X1       |
| XM_014129604.1 | 1.71  | 3.79E-03 | LOC106563758 | interleukin-7 receptor subunit alpha-like_2C transcript variant X1      |
| NM_001140775.1 | -1.68 | 5.94E-12 | cd37         | Leukocyte antigen CD37                                                  |
| XM_014140842.1 | 1.10  | 1.13E-03 | LOC106569467 | leukocyte cell-derived chemotaxin 1-like_2C transcript variant X1       |
| XM_014211962.1 | 1.58  | 4.12E-11 | LOC106611589 | leukocyte cell-derived chemotaxin-2-like_2C transcript variant X1       |
| XM_014201687.1 | 1.47  | 5.54E-08 | LOC106605761 | leukocyte receptor cluster member 8 homolog_2C transcript variant X1    |
| XM_014201694.1 | 1.13  | 1.10E-22 | LOC106605766 | leukocyte receptor cluster member 9-like_2C transcript variant X1       |
| NM_001159373.1 | -1.12 | 1.72E-04 | ll           | leukolectin protein                                                     |
| NM_001140748.1 | 2.30  | 3.15E-05 | lt4r1        | Leukotriene B4 receptor 1                                               |
| XM_014191684.1 | 1.89  | 2.40E-11 | LOC106600382 | leukotriene B4 receptor 1-like_2C transcript variant X1                 |
| XM_014153881.1 | -1.06 | 9.11E-05 | LOC106576634 | lymphocyte activation gene 3 protein-like                               |
| XM_014202496.1 | -1.54 | 1.99E-12 | LOC106606339 | lymphocyte-specific helicase-like_2C transcript variant X1              |
| NM_001141513.1 | -1.60 | 1.07E-09 | topk         | Lymphokine-activated killer T-cell-originated protein kinase homolog    |
| NM_001141422.2 | 1.76  | 8.53E-05 | mip2a        | Macrophage inflammatory protein 2-alpha                                 |
| NM_001141547.1 | -1.07 | 8.85E-06 | mif          | macrophage migration inhibitory factor                                  |
| XM_014164327.1 | -2.94 | 3.58E-17 | LOC106581890 | major histocompatibility complex class I-related gene protein-like      |
| XM_014188250.1 | -2.92 | 1.79E-04 | LOC106597015 | major histocompatibility complex class I-related gene protein-like_2C   |
| XM_014182254.1 | 9.14  | 4.89E-07 | LOC106591067 | mucin-12-like                                                           |
| XM_014151948.1 | 3.55  | 1.03E-04 | LOC106575448 | mucin-17-like                                                           |
| XM_014215536.1 | 4.45  | 2.73E-03 | LOC106613376 | mucin-19-like                                                           |
| XM_014177637.1 | 7.88  | 6.73E-21 | LOC106588522 | mucin-2-like                                                            |
| XM_014187672.1 | 3.21  | 2.05E-12 | LOC106596373 | mucin-2-like                                                            |
| XM_014177096.1 | 4.52  | 1.50E-04 | LOC106588256 | mucin-2-like                                                            |
| XM_014195406.1 | 11.15 | 7.77E-61 | LOC106602652 | mucin-5AC-like                                                          |
| XM_014191480.1 | 6.92  | 3.52E-29 | LOC106600148 | mucin-5AC-like                                                          |
| XM_014175874.1 | 2.56  | 3.80E-13 | LOC106587462 | mucin-5B-like                                                           |
| XM_014123270.1 | 1.74  | 1.14E-04 | LOC106560392 | mucin-7-like_2C transcript variant X1                                   |
| XM_014182612.1 | 3.02  | 8.72E-03 | LOC106591388 | neutrophil cytosol factor 4-like                                        |
| XM_014183791.1 | 1.37  | 8.57E-08 | LOC106592447 | NF-kappa-B essential modulator-like                                     |
| XM_014204687.1 | 1.02  | 1.95E-14 | LOC106607598 | NF-kappa-B inhibitor alpha-like                                         |
| XM_014214975.1 | 1.91  | 2.52E-04 | nos2         | nitric oxide synthase 2_2C inducible_2C transcript variant X1           |
| XM_014164090.1 | -1.10 | 2.52E-04 | nostrin      | nitric oxide synthase trafficking                                       |
| XM_014159943.1 | 3.93  | 1.37E-04 | LOC106579776 | NK-tumor recognition protein-like                                       |
| XM_014130660.1 | 1.14  | 9.88E-06 | LOC106564532 | nuclear factor interleukin-3-regulated protein-like_2C transcript       |
| XM_014175275.1 | 1.20  | 2.27E-07 | LOC106587185 | nuclear factor of activated T-cells 5-like_2C transcript variant X1     |
| XM_014177036.1 | 1.07  | 2.85E-06 | LOC106588230 | nuclear factor of activated T-cells_2C cytoplasmic 1-like_2C            |
| XM_014177007.1 | -1.14 | 7.38E-06 | LOC106588224 | programmed cell death 1 ligand 1-like                                   |
| XM_014185045.1 | 2.43  | 7.28E-03 | LOC106593672 | programmed cell death 6-interacting protein-like                        |
| XM_014183194.1 | 1.36  | 1.40E-09 | LOC106591927 | suppressor of cytokine signaling 1-like                                 |
| XM_014194350.1 | 1.96  | 1.38E-15 | LOC106601915 | suppressor of cytokine signaling 3-like                                 |
| XM_014192483.1 | 2.10  | 5.81E-04 | LOC106600801 | suppressor of cytokine signaling 7-like_2C transcript variant X1        |
| XM_014129570.1 | -1.57 | 3.82E-07 | LOC106563739 | T-cell surface antigen CD2-like_2C transcript variant X1                |
| XM_014189050.1 | -1.59 | 1.16E-08 | LOC106597940 | T-cell surface glycoprotein CD1c-like_2C transcript variant X1          |
| XM_014162423.1 | 1.95  | 6.44E-03 | LOC106580890 | T-cell surface glycoprotein CD3 delta chain-like                        |
| XM_014199173.1 | -2.39 | 2.06E-04 | LOC106604508 | T-cell surface glycoprotein CD8 beta chain-like                         |
| XM_014142947.1 | -1.06 | 7.33E-09 | LOC106570527 | TLR4 interactor with leucine rich repeats-like                          |
| XM_014178347.1 | -1.02 | 7.47E-07 | LOC106588859 | TLR4 interactor with leucine rich repeats-like                          |
| XM_014137409.1 | -1.77 | 1.49E-03 | LOC106567744 | TNF receptor-associated factor 2-like                                   |
| XM_014163086.1 | 1.54  | 9.68E-04 | LOC106581191 | TNF receptor-associated factor 4-like                                   |
| XM_014178938.1 | -1.32 | 2.87E-05 | LOC106589219 | toll-like receptor 13                                                   |
| XM_014199800.1 | 1.16  | 2.37E-07 | LOC106604777 | toll-like receptor 6                                                    |
| XM_014157098.1 | 1.01  | 1.03E-12 | LOC106578374 | TRAF2 and NCK-interacting protein kinase-like_2C transcript variant X1  |
| XM_014139936.1 | 3.37  | 3.19E-38 | LOC106569003 | transforming growth factor beta-1-like                                  |
| NM_001123617.1 | 1.08  | 3.18E-03 | LOC100136509 | tumor necrosis factor alpha                                             |

|                |       |          |              |                                                                         |
|----------------|-------|----------|--------------|-------------------------------------------------------------------------|
| NM_001123590.1 | 3.05  | 1.99E-09 | tnf-alpha-2  | tumor necrosis factor alpha-2 precursor                                 |
| XM_014181607.1 | -1.41 | 1.70E-19 | LOC106590519 | tumor necrosis factor ligand superfamily member 10-like_2C              |
| XM_014206883.1 | -1.88 | 8.28E-18 | LOC106608761 | tumor necrosis factor ligand superfamily member 12-like                 |
| XM_014170639.1 | 1.86  | 5.44E-28 | LOC106584955 | tumor necrosis factor receptor superfamily member 10B-like_2C           |
| XM_014177272.1 | 1.68  | 4.10E-11 | LOC106588364 | tumor necrosis factor receptor superfamily member 11B-like              |
| XM_014196829.1 | -1.21 | 1.25E-03 | LOC106603311 | tumor necrosis factor receptor superfamily member 19-like               |
| XM_014163439.1 | 3.29  | 1.19E-23 | LOC106581397 | tumor necrosis factor receptor superfamily member 19L-like              |
| XM_014205335.1 | 3.66  | 5.64E-08 | LOC106607875 | tumor necrosis factor receptor superfamily member 21-like               |
| XM_014133628.1 | 4.89  | 2.27E-21 | LOC106565937 | tumor necrosis factor receptor superfamily member 21-like_2C            |
| XM_014153851.1 | 4.05  | 2.33E-11 | LOC106576603 | tumor necrosis factor receptor superfamily member 5-like                |
| XM_014146103.1 | 3.35  | 8.54E-34 | LOC106572181 | tumor necrosis factor receptor superfamily member 6B-like               |
| XM_014146497.1 | 2.20  | 2.39E-44 | LOC106572390 | tumor necrosis factor receptor superfamily member 9-like_2C             |
| XM_014136451.1 | 3.00  | 1.42E-32 | tnfrsf6b     | tumor necrosis factor receptor superfamily_2C member 6b_2C              |
| XM_014182070.1 | 3.48  | 6.91E-05 | LOC106590894 | tumor protein D52-like                                                  |
| XM_014134677.1 | 1.11  | 8.94E-09 | tp53inp2     | tumor protein p53 inducible nuclear protein 2_2C transcript variant X1  |
| XM_014211497.1 | -1.15 | 1.21E-05 | tp53i3       | tumor protein p53 inducible protein 3_2C transcript variant X1          |
| XM_014176373.1 | 1.04  | 2.84E-04 | LOC106587750 | tumor suppressor p53-binding protein 1-like                             |
| XM_014206242.1 | 4.38  | 9.61E-03 | myb          | v-myb avian myeloblastosis viral oncogene homolog                       |
| XM_014166334.1 | -1.28 | 1.98E-09 | mybl2        | v-myb avian myeloblastosis viral oncogene homolog-like 2_2C transcript  |
| XM_014215119.1 | 3.06  | 5.92E-05 | LOC106613145 | von Willebrand factor A domain-containing protein 5A-like_2C transcript |
| XM_014209801.1 | 2.24  | 4.14E-14 | LOC106610433 | von Willebrand factor A domain-containing protein 7-like                |
| XM_014190593.1 | -1.05 | 1.79E-14 | LOC106599384 | von Willebrand factor C domain-containing protein 2-like                |
| XM_014151598.1 | 4.75  | 3.19E-08 | LOC106575228 | von Willebrand factor D and EGF domain-containing protein-like          |
| XM_014126136.1 | 1.14  | 3.73E-03 | LOC106561866 | von Willebrand factor-like                                              |
| XM_014159196.1 | 1.54  | 3.74E-09 | LOC106579350 | Wilms tumor protein 1-interacting protein-like_2C transcript variant X1 |

**Table S6. Summary of statistics for RRBS libraries**

| Group            | Sample ID | Single raw reads (millions) | QC reads (millions) | Total alignment (%) | Unique alignment (%) | CpG methylation (%) | CHG methylation (%) | CHH methylation (%) | Bisulphite conversion efficiency (%) | Inappropriate conversion (%) |
|------------------|-----------|-----------------------------|---------------------|---------------------|----------------------|---------------------|---------------------|---------------------|--------------------------------------|------------------------------|
| Control          | 15        | 57.91                       | 57.84               | 91.46               | 43.29                | 74.68               | 0.38                | 0.28                | 99.80                                | 2.50                         |
| Control          | 16        | 87.99                       | 87.73               | 89.88               | 43.22                | 73.96               | 0.48                | 0.36                | 99.60                                | 2.60                         |
| Control          | 17        | 102.56                      | 102.42              | 92.60               | 44.52                | 73.60               | 0.47                | 0.36                | 99.60                                | 2.00                         |
| Control          | 18        | 65.43                       | 65.36               | 92.77               | 44.95                | 74.42               | 0.46                | 0.37                | 99.60                                | 2.40                         |
| Control          | 40        | 77.47                       | 77.36               | 87.12               | 42.58                | 77.05               | 0.40                | 0.30                | 99.80                                | 2.30                         |
| Control          | 45        | 33.72                       | 33.56               | 91.77               | 43.15                | 74.61               | 0.48                | 0.36                | 99.70                                | 2.60                         |
| Control          | 46        | 49.49                       | 49.45               | 92.76               | 44.93                | 75.58               | 0.47                | 0.37                | 99.70                                | 1.70                         |
| Control          | 47        | 60.37                       | 60.36               | 90.15               | 43.40                | 75.08               | 0.37                | 0.28                | 99.70                                | 1.90                         |
| Control          | 48        | 46.43                       | 46.30               | 89.52               | 42.66                | 74.01               | 0.39                | 0.29                | 99.80                                | 2.40                         |
| Cold shock       | 25        | 61.67                       | 61.63               | 91.65               | 44.19                | 74.84               | 0.47                | 0.37                | 99.60                                | 2.00                         |
| Cold shock       | 26        | 59.70                       | 59.60               | 92.36               | 44.20                | 76.02               | 0.47                | 0.37                | 99.70                                | 1.80                         |
| Cold shock       | 27        | 74.88                       | 74.79               | 92.30               | 43.48                | 76.42               | 0.48                | 0.36                | 99.60                                | 1.90                         |
| Cold shock       | 28        | 48.04                       | 47.90               | 91.66               | 42.44                | 76.11               | 0.49                | 0.36                | 99.70                                | 1.60                         |
| Cold shock       | 55        | 51.63                       | 51.62               | 90.75               | 44.58                | 72.96               | 0.37                | 0.27                | 99.70                                | 2.00                         |
| Cold shock       | 56        | 50.06                       | 50.06               | 90.34               | 44.06                | 72.03               | 0.37                | 0.27                | 99.70                                | 1.40                         |
| Cold shock       | 57        | 55.09                       | 54.90               | 90.75               | 43.03                | 72.40               | 0.39                | 0.29                | 99.90                                | 1.50                         |
| Cold shock       | 58        | 70.79                       | 70.78               | 90.06               | 43.88                | 71.54               | 0.37                | 0.27                | 99.70                                | 3.00                         |
| Substrate stress | 9         | 67.72                       | 67.66               | 91.17               | 43.26                | 78.18               | 0.40                | 0.29                | 99.80                                | 2.20                         |
| Substrate stress | 10        | 74.09                       | 72.91               | 88.24               | 40.43                | 73.81               | 0.48                | 0.36                | 99.60                                | 2.00                         |
| Substrate stress | 35        | 64.73                       | 64.70               | 92.31               | 44.51                | 78.07               | 0.47                | 0.37                | 99.70                                | 1.60                         |
| Substrate stress | 36        | 78.69                       | 78.66               | 87.41               | 44.22                | 72.72               | 0.37                | 0.28                | 99.70                                | 1.90                         |
| Substrate stress | 37        | 62.45                       | 62.32               | 87.82               | 42.05                | 74.75               | 0.39                | 0.30                | 99.80                                | 2.60                         |
| Substrate stress | 38        | 63.47                       | 63.46               | 89.08               | 44.35                | 71.80               | 0.36                | 0.27                | 99.80                                | 3.10                         |
| Substrate stress | 39        | 72.97                       | 72.80               | 90.44               | 42.11                | 75.24               | 0.49                | 0.37                | 99.60                                | 2.00                         |
| <i>Mean</i>      |           | <i>63.73</i>                | <i>63.59</i>        | <i>90.42</i>        | <i>43.39</i>         | <i>74.46</i>        | <i>0.42</i>         | <i>0.32</i>         | <i>99.71</i>                         | <i>2.04</i>                  |



**Table S7a. Genes with altered baseline expression and p.promoter methylation in acutely stressed fish**

| Gene         | Gene description                                             | $\Delta$ Methylation (%) | $\Delta$ Expression (Log2 FC) |
|--------------|--------------------------------------------------------------|--------------------------|-------------------------------|
| LOC106577598 | excitatory amino acid transporter 3-like                     | -7.17                    | 3.18                          |
| LOC106563595 | protein shisa-2 homolog_2C transcript variant X1             | -6.11                    | 2.74                          |
| LOC106606008 | growth hormone secretagogue receptor type 1-like             | -6.24                    | 2.42                          |
| LOC106596092 | uncharacterized ncRNA                                        | -11.77                   | 1.99                          |
| LOC106601990 | dexamethasone-induced Ras-related protein 1-like             | -21.69                   | 1.99                          |
| LOC106568995 | serotransferrin-1-like                                       | -5.11                    | 1.81                          |
| LOC106611560 | glutamate receptor 2-like_2C transcript variant X1           | -6.45                    | 1.77                          |
| LOC106610943 | XK-related protein 6-like_2C transcript variant X1           | -19.97                   | 1.67                          |
| LOC106578303 | serine/threonine-protein kinase BRSK2-like_2C variant X1     | -17.09                   | 1.45                          |
| LOC106562184 | uncharacterized ncRNA                                        | -6.70                    | 1.35                          |
| LOC106610664 | peptide methionine sulfoxide reductase MsrA 1-like           | -8.94                    | 1.31                          |
| LOC106600757 | uncharacterized                                              | -5.92                    | 1.22                          |
| LOC106561738 | sperm acrosome membrane-associated protein 4-like            | -6.78                    | 1.19                          |
| LOC106579386 | uncharacterized                                              | -5.59                    | 1.12                          |
| Gene         | Gene description                                             | $\Delta$ Methylation (%) | $\Delta$ Expression (Log2 FC) |
| LOC106563054 | V-type proton ATPase subunit B_2C brain isoform              | 7.16                     | 1.11                          |
| LOC106565116 | BTB/POZ domain-containing protein KCTD20-l2C X1              | 9.79                     | 1.06                          |
| LOC106569644 | YEATS domain-containing protein 2-like_2C transcript X1      | 13.51                    | 1.88                          |
| LOC106573335 | cilia- and flagella-associated protein 44-like_2C transcript | 5.52                     | 1.39                          |
| cx113        | C-X-C motif chemokine 13                                     | 5.89                     | 1.13                          |
| nkx2-6       | NK2 homeobox 6%2C transcript variant X1                      | 5.09                     | 1.502715936                   |
| Gene         | Gene description                                             | $\Delta$ Methylation (%) | $\Delta$ Expression (Log2 FC) |
| hepc1        | Hepcidin-1                                                   | -7.45                    | -1.88                         |
| LOC106568783 | calcium-activated potassium channel subunit beta-3-like      | -6.23                    | -1.29                         |
| LOC106600637 | protein shisa-3 homolog                                      | -16.37                   | -1.58                         |
| LOC106569906 | uncharacterized LOC106569906                                 | -9.73                    | -4.71                         |
| LOC106572843 | tetraspan membrane protein of hair cell stereocilia          | -6.65                    | -2.49                         |
| LOC106581468 | extracellular calcium-sensing receptor-like                  | -8.61                    | -4.48                         |
| LOC106602114 | tyrosine-protein phosphatase 13                              | -7.11                    | -1.12                         |
| LOC106612219 | BTB/POZ domain-containing protein KCTD16-like                | -6.31                    | -2.88                         |
| Gene         | Gene description                                             | $\Delta$ Methylation (%) | $\Delta$ Expression (Log2 FC) |
| LOC106580260 | natterin-3-like                                              | 5.19                     | -5.55                         |
| trp-ii       | trypsin II                                                   | 11.89                    | -5.32                         |
| LOC106602273 | TATA box-binding protein-like protein 2                      | 8.54                     | -3.34                         |
| LOC106566573 | opsin-5-like_2C transcript variant X1                        | 5.95                     | -3.14                         |
| LOC106586110 | uncharacterized ncRNA                                        | 5.65                     | -3.02                         |
| LOC106575957 | protein Wnt-7b-like                                          | 9.39                     | -1.77                         |
| LOC106582036 | tryptophan--tRNA ligase, mitochondrial-like                  | 6.06                     | -1.60                         |
| epo          | erythropoietin_2C transcript variant X1                      | 5.49                     | -1.44                         |
| LOC106580238 | uncharacterized                                              | 8.66                     | -1.25                         |
| LOC106586743 | uncharacterized ncRNA                                        | 5.23                     | -1.25                         |
| LOC106608787 | ATP-binding cassette sub-family A member 1-like_2C           | 8.21                     | -1.21                         |
| LOC106613793 | uncharacterized ncRNA                                        | 6.15                     | -1.00                         |

**Table S7b. Genes with altered baseline expression and p.promoter methylation in chronically stressed fish**

| Gene         | Gene description                                                   | Δ Methylation (%) | Δ Expression (Log2 FC) |
|--------------|--------------------------------------------------------------------|-------------------|------------------------|
| LOC106561413 | transcription factor RFX4-like_2C transcript variant X1            | -5.42             | 1.52                   |
| LOC106563595 | protein shisa-2 homolog_2C transcript variant X1                   | -10.71            | 2.21                   |
| LOC106566683 | uncharacterized ncRNA                                              | -7.20             | 1.37                   |
| LOC106569644 | YEATS domain-containing protein 2-like_2C transcript X1            | -11.25            | 1.46                   |
| LOC106573011 | Uncharacterized                                                    | -14.81            | 1.20                   |
| LOC106576054 | aldose reductase-like                                              | -12.99            | 1.16                   |
| LOC106577897 | plasminogen activator inhibitor 1-like                             | -7.75             | 1.54                   |
| LOC106577954 | uncharacterized ncRNA                                              | -6.21             | 3.15                   |
| LOC106583227 | transcription factor Sp5-like                                      | -7.89             | 1.11                   |
| LOC106584559 | sperm acrosome membrane-associated protein 4-like_2C               | -8.06             | 3.21                   |
| LOC106585649 | complement C1q-like protein 2                                      | -5.62             | 1.66                   |
| LOC106585892 | piggyBac transposable element-derived protein 4-like_2C            | -5.25             | 1.66                   |
| LOC106590765 | potassium voltage-gated channel subfamily H member 7-2C            | -5.46             | 1.07                   |
| LOC106602848 | vitronectin-like                                                   | -7.75             | 1.09                   |
| LOC106604908 | rod cGMP-specific 3',5'-cyclic phosphodiesterase alpha-like        | -9.50             | 1.35                   |
| LOC106606455 | cytochrome P450 2K3-like                                           | -12.30            | 1.33                   |
| LOC106608067 | serine/threonine-protein kinase PAK 7 pseudogene                   | -6.60             | 2.02                   |
| LOC106608776 | E3 ubiquitin-protein ligase KEG-like                               | -11.09            | 1.21                   |
| slc5a12      | solute carrier family 5 (sodium/monocarboxylate) 2C                | -5.53             | 1.44                   |
| Gene         | Gene description                                                   | Δ Methylation (%) | Δ Expression (Log2 FC) |
| ier3         | immediate early response 3                                         | 9.31              | 1.07                   |
| LOC106561977 | carbonic anhydrase 7-like_2C transcript variant X1                 | 11.78             | 1.35                   |
| LOC106566573 | opsin-5-like_2C transcript variant X1                              | 9.44              | 1.52                   |
| LOC106592616 | serine incorporator 5-like                                         | 9.850638875       | 1.182271959            |
| LOC106593408 | myosin heavy chain%2C fast skeletal muscle-like                    | 8.4408575         | 1.215999959            |
| LOC106613765 | cyclic AMP-responsive element-binding protein 3-like protein 3-B   | 14.88             | 1.39                   |
| LOC106613773 | zinc finger and BTB domain-containing protein 7A-like_2C X2        | 9.60              | 2.36                   |
| Gene         | Gene description                                                   | Δ Methylation (%) | Δ Expression (Log2 FC) |
| LOC106560428 | excitatory amino acid transporter 5-like                           | -8.40             | -6.05                  |
| LOC106581468 | extracellular calcium-sensing receptor-like                        | -6.94             | -3.71                  |
| LOC106582596 | olfactory receptor 51T1-like                                       | -5.41             | -11.84                 |
| LOC106586042 | zinc finger protein ZIC 2-like                                     | -7.06             | -2.09                  |
| LOC106587141 | adhesion G-protein coupled receptor G5-like%2C transcript          | -10.42886         | -1.074079782           |
| LOC106592617 | relaxin-3 receptor 1-like                                          | -14.53788125      | -2.460225901           |
| LOC106602114 | tyrosine-protein phosphatase 13                                    | -5.12             | -1.30                  |
| mcmdc2       | minichromosome maintenance domain containing 2_2C                  | -12.89            | -1.92                  |
| Gene         | Gene description                                                   | Δ Methylation (%) | Δ Expression (Log2 FC) |
| LOC106560954 | uncharacterized                                                    | 8.37              | -2.64                  |
| LOC106561337 | DNA polymerase subunit gamma-1-like                                | 6.32              | -2.01                  |
| LOC106561347 | uncharacterized ncRNA                                              | 12.56             | -1.23                  |
| LOC106561447 | cyclic nucleotide-gated cation channel beta-1-like_2C transcript t | 5.63              | -5.54                  |
| LOC106561738 | sperm acrosome membrane-associated protein 4-like                  | 10.38             | -14.29                 |
| LOC106563054 | V-type proton ATPase subunit B_2C brain isoform                    | 6.88              | -1.25                  |
| LOC106565359 | sodium- and chloride-dependent GABA transporter 2-like             | 16.26             | -1.03                  |
| LOC106571889 | pro-thyrotropin-releasing hormone-A-like                           | 5.29              | -4.51                  |
| LOC106572438 | membrane-assoc. guanylate kinase2C WW & PDZ domain                 | 5.67              | -2.33                  |
| LOC106575957 | protein Wnt-7b-like                                                | 9.21              | -4.71                  |
| LOC106579674 | uncharacterized ncRNA                                              | 6.13              | -1.07                  |
| LOC106588148 | protein S100-A1-like_2C transcript variant X1                      | 5.87              | -1.11                  |
| LOC106593573 | serine protease HTRA3 pseudogene                                   | 7.82              | -3.73                  |
| LOC106601301 | cilia- and flagella-associated protein 52-like                     | 5.13              | -2.83                  |
| LOC106605020 | uncharacterized LOC106605020                                       | 6.40              | -3.58                  |
| LOC106609265 | ankyrin repeat and EF-hand domain-containing protein 1-like        | 5.10              | -1.20                  |
| LOC106611494 | multidrug resistance-associated protein 5-like                     | 8.22              | -2.03                  |
| trp-ii       | trypsin II                                                         | 5.31              | -6.36                  |

**Table S8a. Genes with altered baseline expression and gene body methylation in acutely stressed fish**

| Gene         | Gene description                                                 | Δ Methylation (%) | Δ Expression (Log2 FC) |
|--------------|------------------------------------------------------------------|-------------------|------------------------|
| LOC106565290 | E3 ubiquitin-protein ligase RNF182-like                          | -5.17             | 4.01                   |
| LOC106570817 | amyloid beta A4 precursor protein-binding family A               | -6.35             | 1.17                   |
| LOC106573771 | uncharacterized ncRNA                                            | -7.19             | 2.49                   |
| LOC106576321 | synaptotagmin-10-like_2C transcript variant X1                   | -5.57             | 1.71                   |
| LOC106581750 | N-chimaerin-like                                                 | -5.90             | 1.06                   |
| LOC106581805 | sodium-driven chloride bicarbonate exchanger-like_2C X1          | -11.43            | 1.07                   |
| LOC106587310 | uncharacterized ncRNA                                            | -6.87             | 2.63                   |
| LOC106589807 | muscular LMNA-interacting protein-like_2C transcript variant X3  | -9.40             | 1.26                   |
| LOC106599779 | voltage-dependent R-type calcium channel subunit alpha-1E-2C     | -5.87             | 2.44                   |
| LOC106604113 | netrin receptor UNC5A-like                                       | -5.65             | 3.04                   |
| LOC106609476 | protein FAM19A2-like_2C transcript variant X1                    | -6.31             | 1.12                   |
| LOC106610610 | suppressor of cytokine signaling 4-like                          | -5.29             | 2.00                   |
| LOC106611538 | BTB/POZ domain-containing protein KCTD8-like                     | -9.86             | 1.70                   |
| LOC106611781 | nocturnin-like                                                   | -5.38             | 4.11                   |
| LOC106613542 | alpha-N-acetylgalactosaminide alpha-2_2C6-sialyltransferase 5    | -14.60            | 1.12                   |
| Gene         | Gene description                                                 | Δ Methylation (%) | Δ Expression (Log2 FC) |
| LOC106560522 | protein FAM183A-like                                             | 12.35             | 1.21                   |
| LOC106561437 | nuclear pore complex protein Nup205-like                         | 6.40              | 1.05                   |
| LOC106562934 | Uncharacterized                                                  | 6.86              | 2.05                   |
| LOC106564664 | septin-9-like_2C transcript variant X1                           | 14.47             | 1.16                   |
| LOC106569543 | K/Na hyperpolarization-activated cyclic nucleotide-gated channel | 5.64              | 1.23                   |
| LOC106571577 | homeobox protein OTX2-like                                       | 7.67              | 1.65                   |
| LOC106572438 | guanylate kinase_2C WW and PDZ domain-containing                 | 5.02              | 4.08                   |
| LOC106573253 | protein HOS4-like                                                | 5.15              | 1.21                   |
| LOC106575944 | beta-galactoside-binding lectin-like                             | 6.97              | 1.24                   |
| LOC106578851 | heparan sulfate glucosamine 3-O-sulfotransferase 3B1-like_2C     | 7.99              | 1.78                   |
| LOC106580152 | uncharacterized ncRNA                                            | 10.50             | 2.75                   |
| LOC106581793 | beta-1_2C3-galactosyltransferase 1-like_2C transcript X1         | 5.76              | 1.90                   |
| LOC106586981 | cysteine and glycine-rich protein 3-like                         | 6.03              | 4.35                   |
| LOC106591735 | T-box transcription factor TBX15-like                            | 5.28              | 1.09                   |
| LOC106603892 | prefoldin subunit 1-like                                         | 8.68              | 1.10                   |
| LOC106607511 | MAGUK p55 subfamily member 3-like_2C transcript variant          | 8.95              | 1.16                   |
| Gene         | Gene description                                                 | Δ Methylation (%) | Δ Expression (Log2 FC) |
| fat1         | FAT atypical cadherin 1                                          | -5.49             | -1.23                  |
| LOC106563594 | wiskott-Aldrich syndrome protein family member 3-like_2C         | -6.78             | -3.79                  |
| LOC106567517 | solute carrier family 22 member 4-like                           | -5.06             | -1.49                  |
| LOC106568191 | uncharacterized ncRNA                                            | -12.63            | -1.65                  |
| LOC106568828 | WD repeat-containing protein 37-like_2C transcript variant X1    | -5.89             | -1.52                  |
| LOC106569225 | ankyrin repeat domain-containing protein 33B-like                | -8.97             | -3.11                  |
| LOC106570740 | CUB and sushi domain-containing protein 1-like                   | -8.70             | -1.28                  |
| LOC106573002 | filamin-A-like                                                   | -7.32             | -4.54                  |
| LOC106577486 | cholecystokinin receptor type A-like                             | -5.40             | -2.33                  |
| LOC106578039 | 5-hydroxytryptamine receptor 2C-like                             | -6.90             | -1.02                  |
| LOC106579994 | G patch domain-containing protein 8-like_2C transcript X1        | -8.33             | -1.46                  |
| LOC106580671 | ATP-binding cassette sub-family G member 1-like                  | -6.32             | -3.12                  |
| LOC106587255 | uncharacterized ncRNA                                            | -13.93            | -1.21                  |
| LOC106587502 | rho-related GTP-binding protein RhoU-like_2C transcript X1       | -5.63             | -1.79                  |
| LOC106590643 | noelin-3-like                                                    | -6.59             | -3.91                  |
| opn4x1b2     | melanopsin                                                       | -6.79             | -1.62                  |
| Gene         | Gene description                                                 | Δ Methylation (%) | Δ Expression (Log2 FC) |
| LOC106561337 | DNA polymerase subunit gamma-1-like                              | 10.20             | -2.01                  |
| LOC106563547 | rod cGMP-specific 3'_2C5'-cyclic phosphodiesterase subunit β     | 10.94             | -1.35                  |
| LOC106567739 | ras-like protein family member 10B                               | 6.50              | -1.60                  |
| LOC106568063 | WSC domain-containing protein 1-like                             | 7.94              | -2.66                  |
| LOC106568744 | major facilitator superfamily domain-containing protein 8-like   | 6.41              | -1.56                  |
| LOC106575141 | GDP-Man:Man(3)GlcNAc(2)-PP-Dol mannosyltransferase               | 5.50              | -2.19                  |
| LOC106575957 | protein Wnt-7b-like                                              | 8.67              | -1.77                  |
| LOC106577438 | formin-2-like                                                    | 5.32              | -2.52                  |
| LOC106578999 | retinol-binding protein 3-like                                   | 5.38              | -1.06                  |
| LOC106580238 | Uncharacterized                                                  | 7.86              | -1.25                  |
| LOC106607611 | Uncharacterized                                                  | 5.47              | -1.23                  |

**Table S8b. Genes with altered baseline expression and gene body methylation in chronically stressed fish**

| Gene         | Gene description                                                 | Δ Methylation (%) | Δ Expression (Log2 FC) |
|--------------|------------------------------------------------------------------|-------------------|------------------------|
| fgf13        | fibroblast growth factor 13_2C transcript variant X1             | -6.18             | 1.90                   |
| igfbp-2b2    | insulin-like growth factor binding protein 2 paralog             | -5.12             | 1.11                   |
| LOC106560781 | uncharacterized ncRNA                                            | -5.74             | 1.27                   |
| LOC106580950 | P2Y purinoceptor 3-like                                          | -12.67            | 2.03                   |
| LOC106581982 | UDP-glucuronic acid decarboxylase 1-like_2C transcript X1        | -5.27             | 2.59                   |
| LOC106608776 | E3 ubiquitin-protein ligase KEG-like                             | -10.37            | 1.21                   |
| LOC106610951 | neuroblast differentiation-associated protein AHNAK-like_2C X2   | -6.26             | 1.23                   |
| LOC106613542 | alpha-N-acetylgalactosaminide alpha-2_2C6-sialyltransferase 5    | -13.29            | 1.06                   |
| Gene         | Gene description                                                 | Δ Methylation (%) | Δ Expression (Log2 FC) |
| LOC106560893 | tyrosine aminotransferase-like_2C transcript variant X1          | 7.94              | 1.20                   |
| LOC106568744 | major facilitator superfamily domain-containing protein 8-like   | 5.36              | 2.38                   |
| LOC106568787 | protein sidekick-2-like                                          | 6.19              | 1.00                   |
| LOC106580152 | uncharacterized ncRNA                                            | 12.13             | 1.76                   |
| LOC106581508 | amine sulfotransferase-like                                      | 11.25             | 1.07                   |
| LOC106599513 | neuropilin-1a-like                                               | 6.04              | 1.85                   |
| LOC106599523 | paired box protein Pax-3-like_2C transcript variant X1           | 16.72             | 1.35                   |
| LOC106603484 | proline-rich protein 7-like_2C transcript variant X1             | 7.68              | 1.53                   |
| LOC106603687 | heparin cofactor 2-like_2C transcript variant X1                 | 5.43              | 1.23                   |
| LOC106607511 | MAGUK p55 subfamily member 3-like_2C transcript variant          | 10.14             | 1.18                   |
| LOC106610780 | mu-type opioid receptor-like_2C transcript variant X1            | 7.00              | 2.05                   |
| slc6a11      | solute carrier family 6 (neurotransmitter transporter)_2C member | 5.03              | 2.08                   |
| Gene         | Gene description                                                 | Δ Methylation (%) | Δ Expression (Log2 FC) |
| cnbd1        | cyclic nucleotide binding domain containing 1_2C transcript      | -7.72             | -1.68                  |
| LOC106563594 | wiskott-Aldrich syndrome protein family member 3-like_2C         | -11.39            | -4.88                  |
| LOC106568431 | uncharacterized ncRNA                                            | -5.70             | -5.51                  |
| LOC106582596 | olfactory receptor 51T1-like                                     | -5.59             | -11.84                 |
| LOC106584188 | BTB/POZ domain-containing protein KCTD1-like_2C X1               | -9.48             | -5.38                  |
| LOC106594335 | zinc finger protein 883-like                                     | -5.50             | -1.48                  |
| LOC106600100 | dynein heavy chain 11_2C axonemal-like                           | -5.32             | -4.43                  |
| LOC106604259 | actin-binding LIM protein 3-like                                 | -6.64             | -3.84                  |
| LOC106610190 | uncharacterized ncRNA                                            | -6.64             | -1.14                  |
| LOC106610691 | interphotoreceptor matrix proteoglycan 1-like_2C transcript X1   | -5.12             | -4.62                  |
| LOC106613873 | leucine-rich repeat-containing protein 24-like                   | -5.62             | -1.95                  |
| rl23a        | 60S ribosomal protein L23a                                       | -5.38             | -1.02                  |
| Gene         | Gene description                                                 | Δ Methylation (%) | Δ Expression (Log2 FC) |
| LOC106560971 | transmembrane protein 117-like                                   | 5.05              | -1.65                  |
| LOC106562934 | uncharacterized                                                  | 5.33              | -1.54                  |
| LOC106565685 | leucine-rich repeat and fibronectin type-III protein             | 5.43              | -1.29                  |
| LOC106567505 | gamma-aminobutyric acid receptor subunit alpha-1-like_2C         | 11.30             | -2.18                  |
| LOC106568087 | uncharacterized ncRNA                                            | 5.57              | -2.05                  |
| LOC106571955 | kinesin heavy chain isoform 5A-like_2C transcript variant        | 5.02              | -1.08                  |
| LOC106574564 | fidgetin-like_2C transcript variant X1                           | 5.31              | -1.21                  |
| LOC106575141 | GDP-Man:Man(3)GlcNAc(2)-PP-Dol -1,2-mannosyltransferase          | 5.82              | -1.56                  |
| LOC106575586 | uncharacterized ncRNA                                            | 5.82              | -2.16                  |
| LOC106575957 | protein Wnt-7b-like                                              | 8.99              | -4.71                  |
| LOC106577813 | sushi_2C von Willebrand factor type A_2C EGF                     | 10.24             | -1.02                  |
| LOC106580233 | kinesin-like protein KIF27                                       | 5.84              | -4.15                  |
| LOC106581393 | glutamate receptor 4-like_2C transcript variant X1               | 5.52              | -1.20                  |
| LOC106583727 | metabotropic glutamate receptor 7-like                           | 5.22              | -4.72                  |
| LOC106585150 | uncharacterized ncRNA                                            | 5.26              | -3.96                  |
| LOC106586981 | cysteine and glycine-rich protein 3-like                         | 9.78              | -2.81                  |
| LOC106605150 | uncharacterized                                                  | 13.97             | -1.33                  |
| LOC106606219 | regulator of G-protein signaling 9-like_2C transcript variant    | 7.63              | -1.27                  |
| LOC106608697 | nuclear factor 7_2C brain-like                                   | 9.82              | -1.07                  |
| LOC106611369 | neurexin-3a-beta-like                                            | 6.00              | -1.81                  |
| scn2b        | sodium channel_2C voltage gated_2C type II beta                  | 6.50              | -1.53                  |

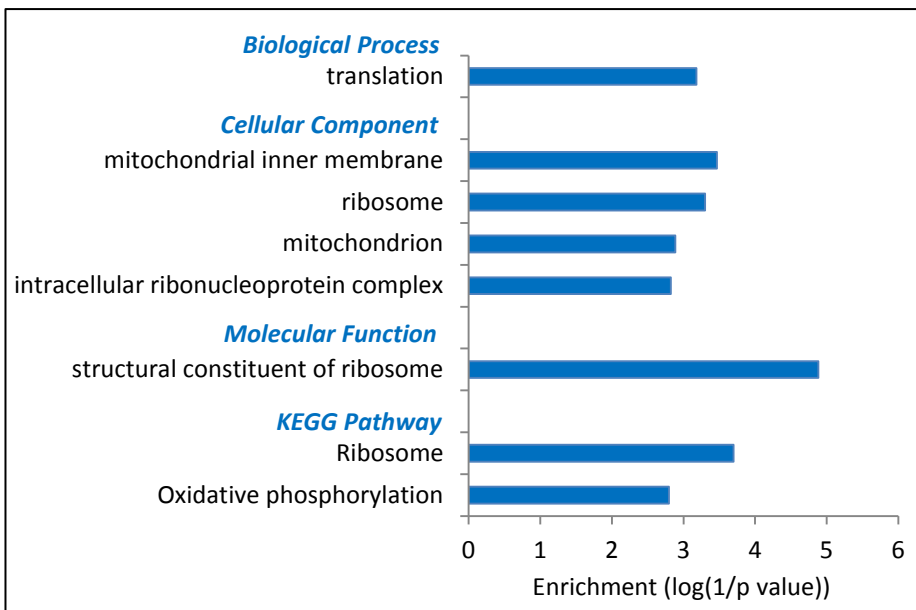

**Figure S1.** Gene Ontology Direct Terms and KEGG pathways significantly over-represented amongst the list of 206 differentially expressed genes identified in chronically-stressed fish compared to the control group ( $q < 0.05$ ).

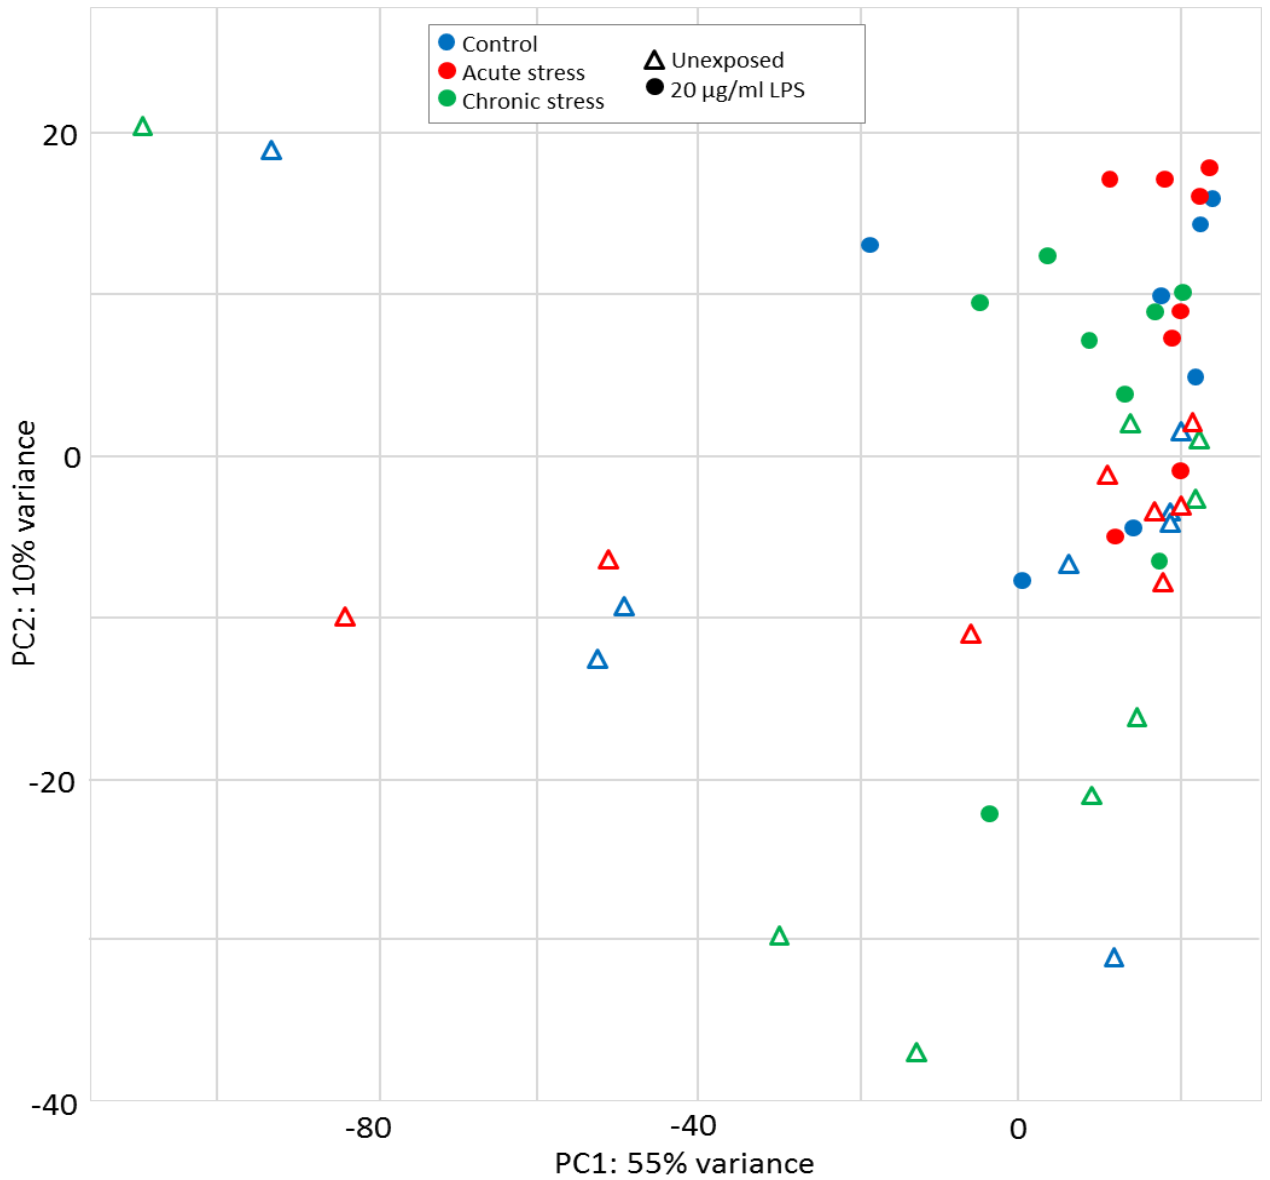

**Figure S2.** PCA illustrating the effect of exposure to 20 µg/ml LPS on the entire gill transcriptome (78,229 putative loci) of fish from all stress treatment groups.



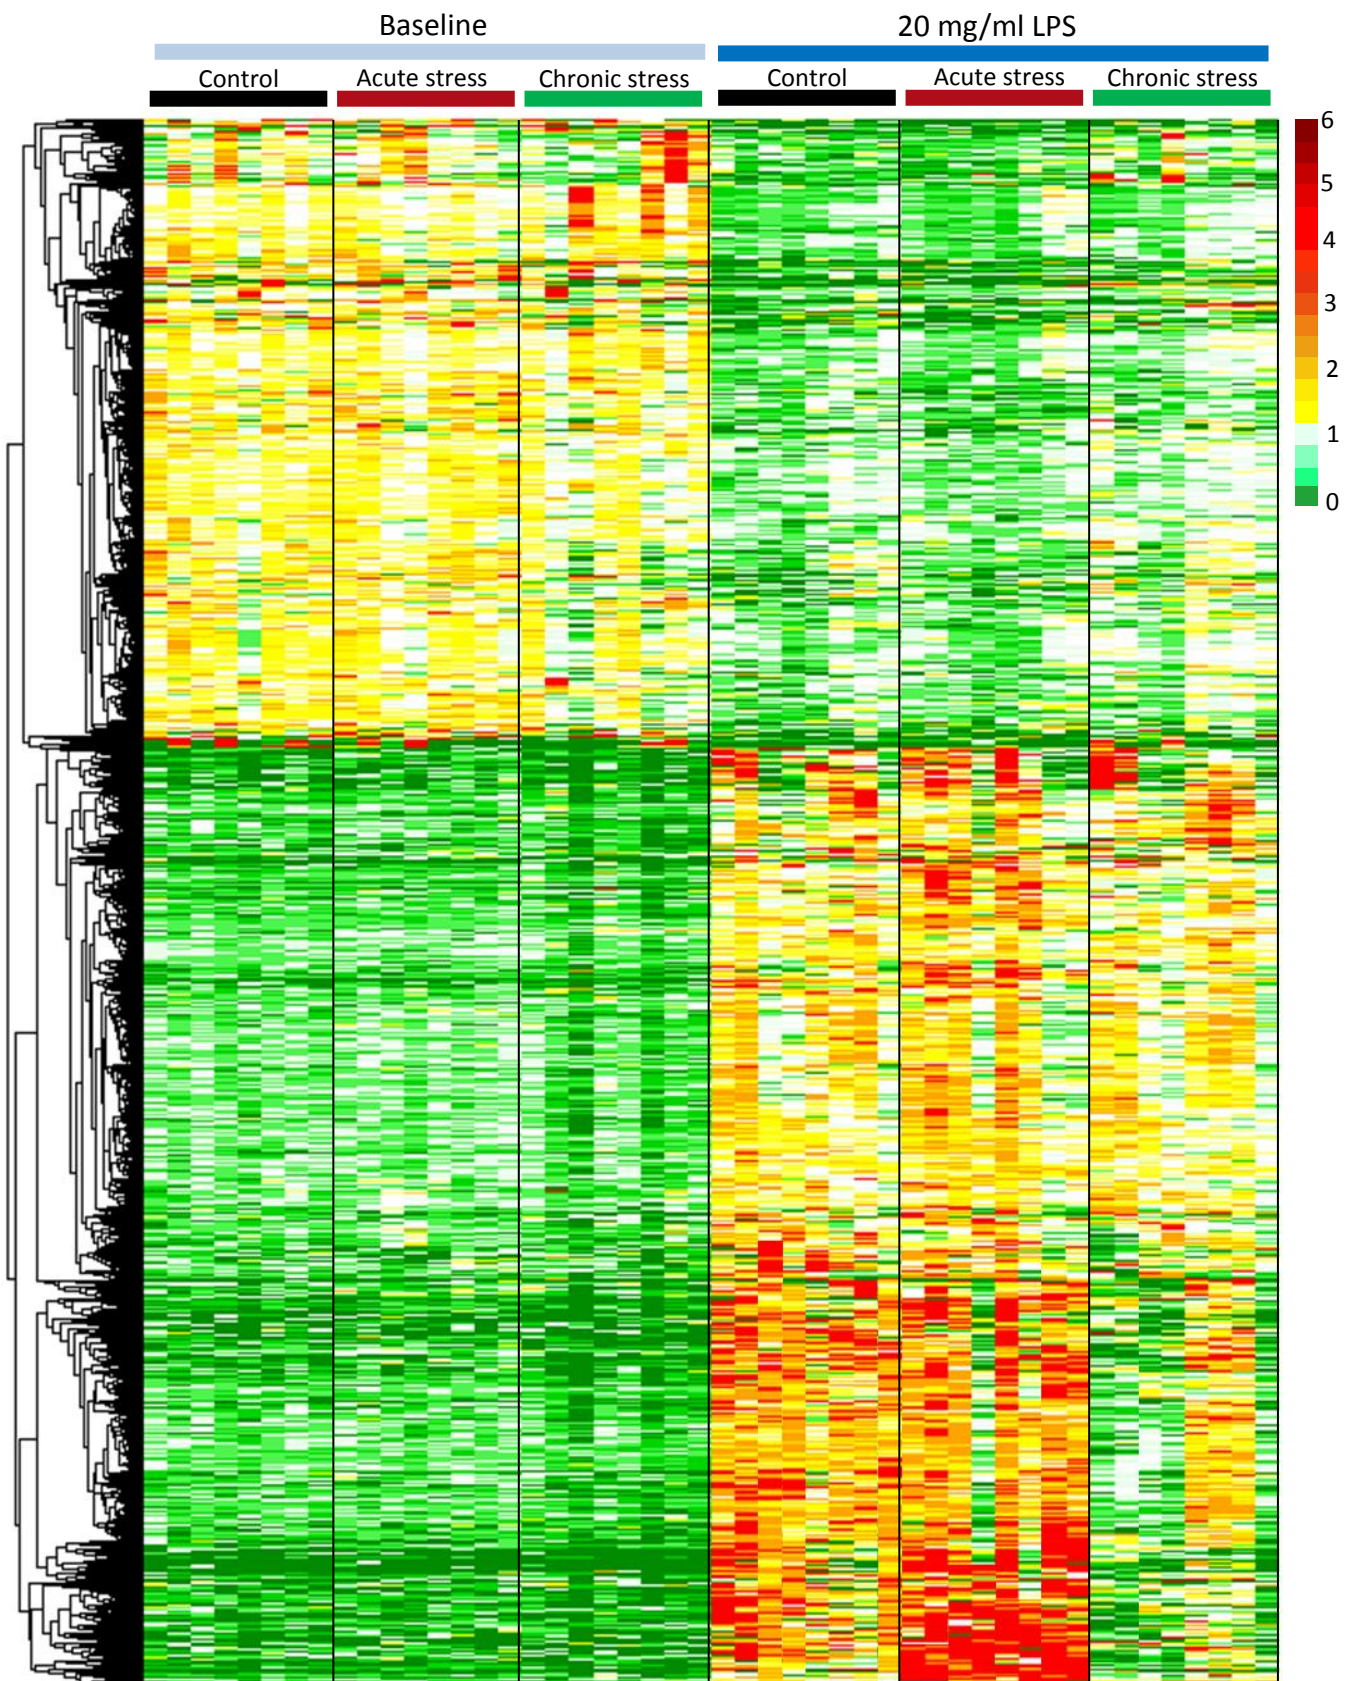

**Figure S3.** Heat map illustrating the expression level of all genes which were significantly regulated following exposure to 20  $\mu$ g/ml LPS for 24h in the non-stressed control fish ( $>2$  FC and FDR  $<0.01$ ). Data presented are read counts for each individual normalised by library size, and by mean expression for each gene. Hierarchical clustering was performed using an Euclidian distance metric.

### A) Up-regulated

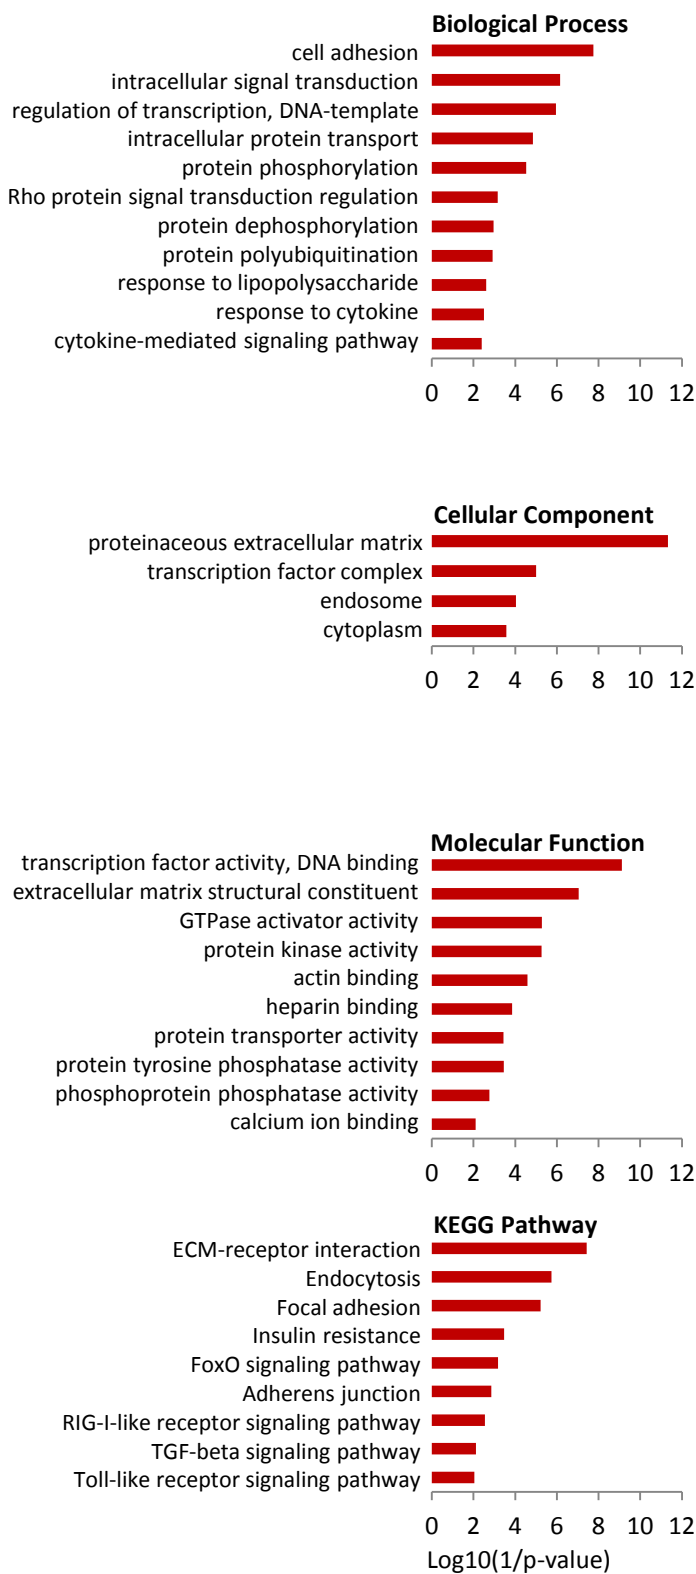

### B) Down-regulated

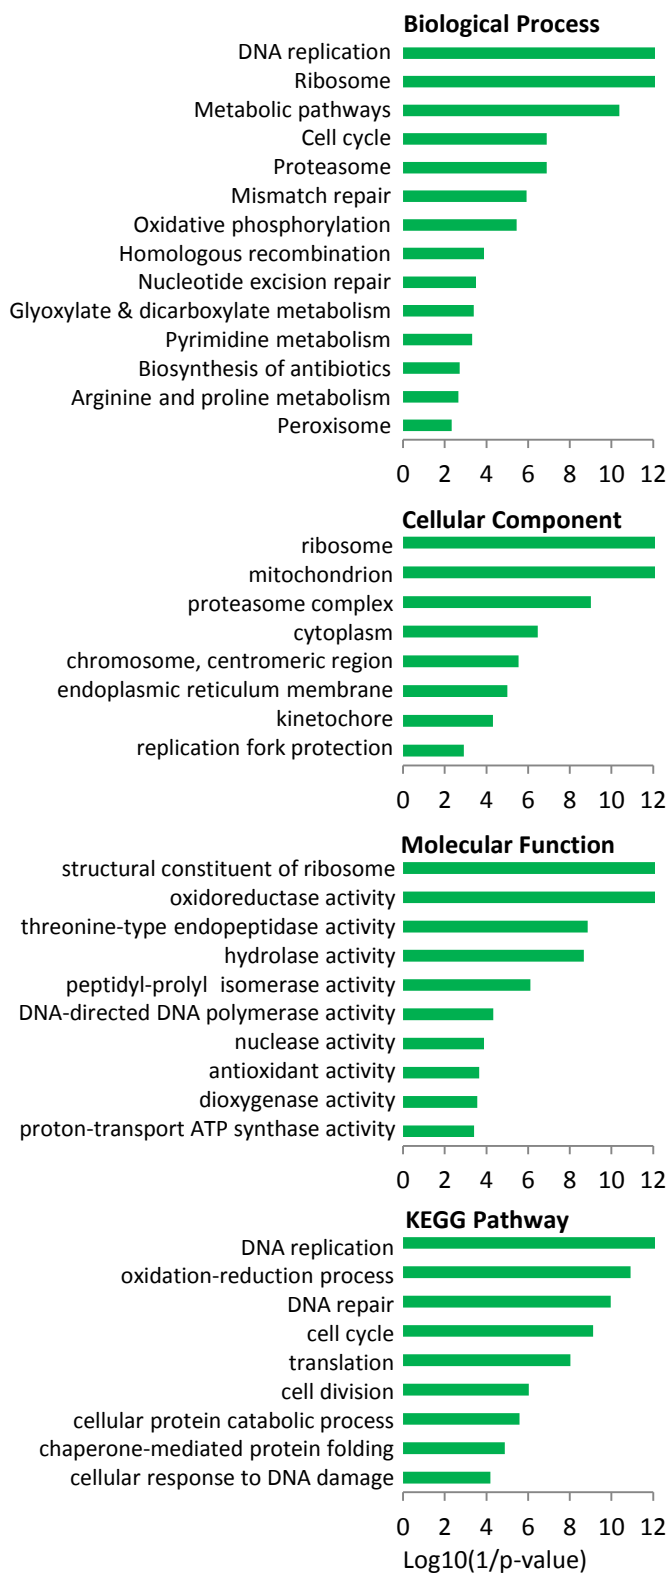

**Figure S4.** Enriched Gene Ontology Terms amongst A) up-regulated genes and B) down-regulated genes following exposure to 20 µg/ml LPS (for the non-stressed control group). Only enriched terms with  $q < 0.05$  are displayed.



### A) Acute stress

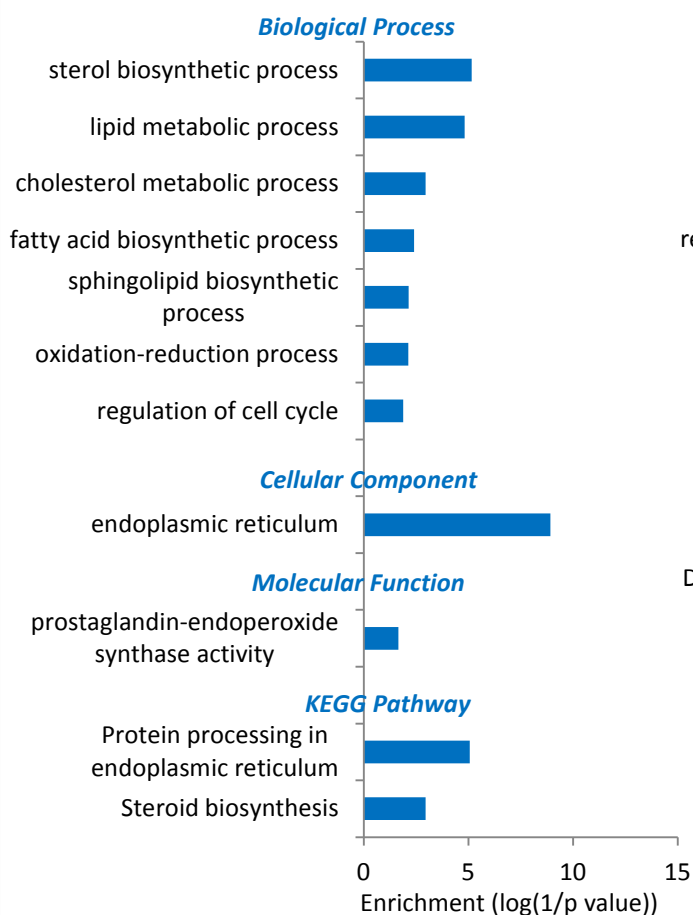

### B) Chronic stress

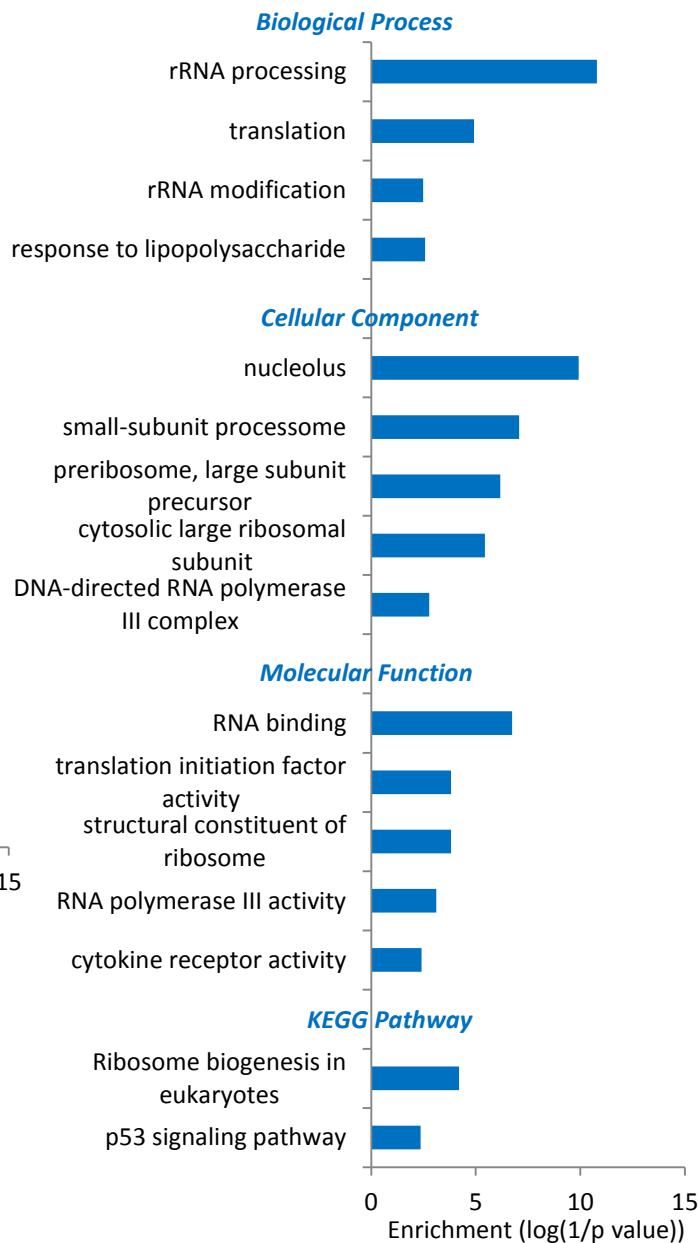

**Figure S5.** Gene Ontology Terms significantly over-represented ( $q < 0.05$ ) amongst the genes for which a significant interaction was identified between transcriptional response to LPS and A) acute stress or B) chronic stress.

### A) Acute stress

#### Biological Process

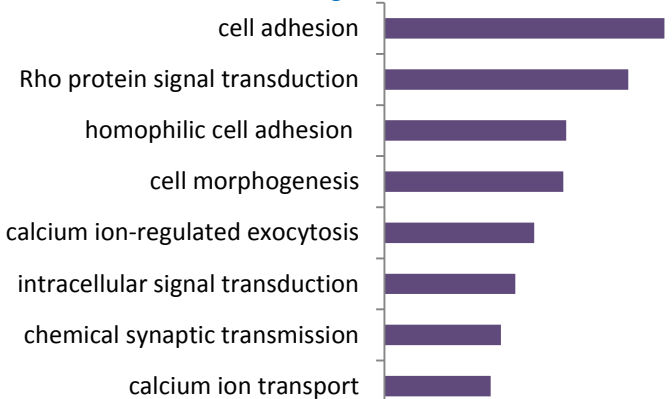

#### Cellular Component

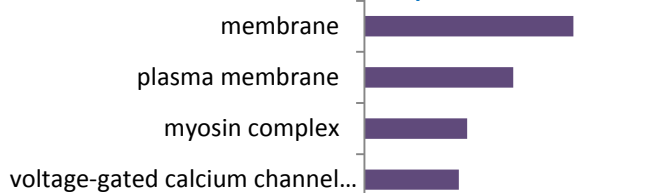

#### Molecular Function

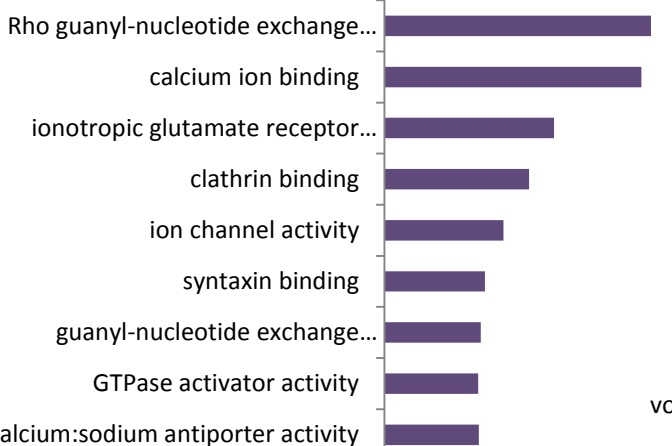

#### KEGG Pathway

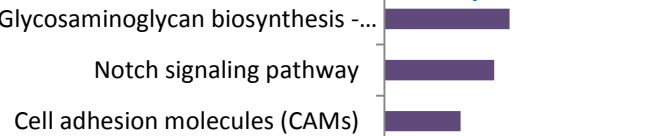

0 2 4 6  
Enrichment (log(1/p value))

### B) Chronic stress

#### Biological Process

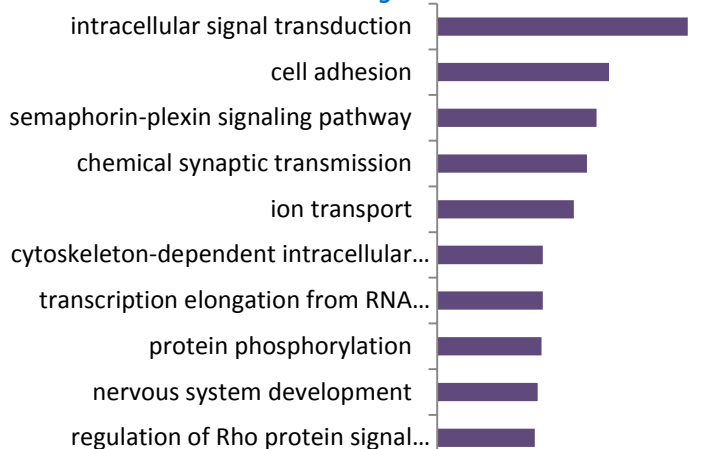

#### Cellular Component

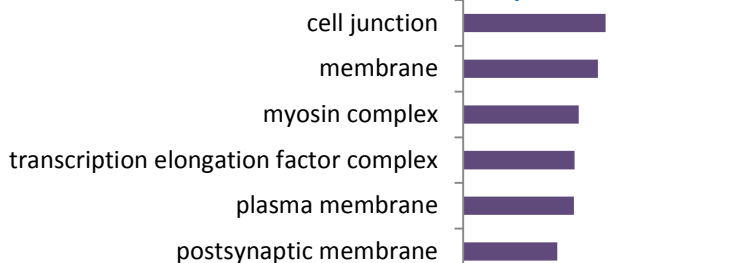

#### Molecular Function

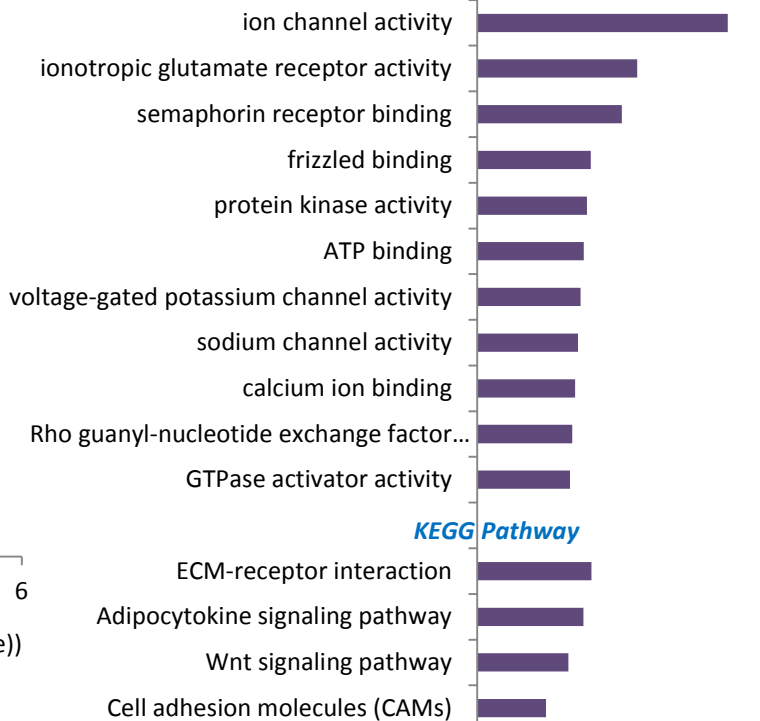

#### KEGG Pathway

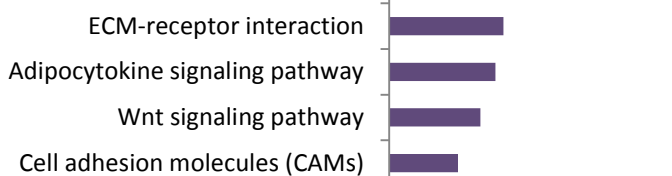

0 2 4 6  
Enrichment (log(1/p value))

**Figure S6.** Gene Ontology Terms and KEGG pathways significantly over-represented ( $q < 0.05$ ) amongst genes that included or neighbored (2 kb upstream of TSS – 2kb downstream of TTS) differentially methylated CpGs for the acute and chronic stress groups.

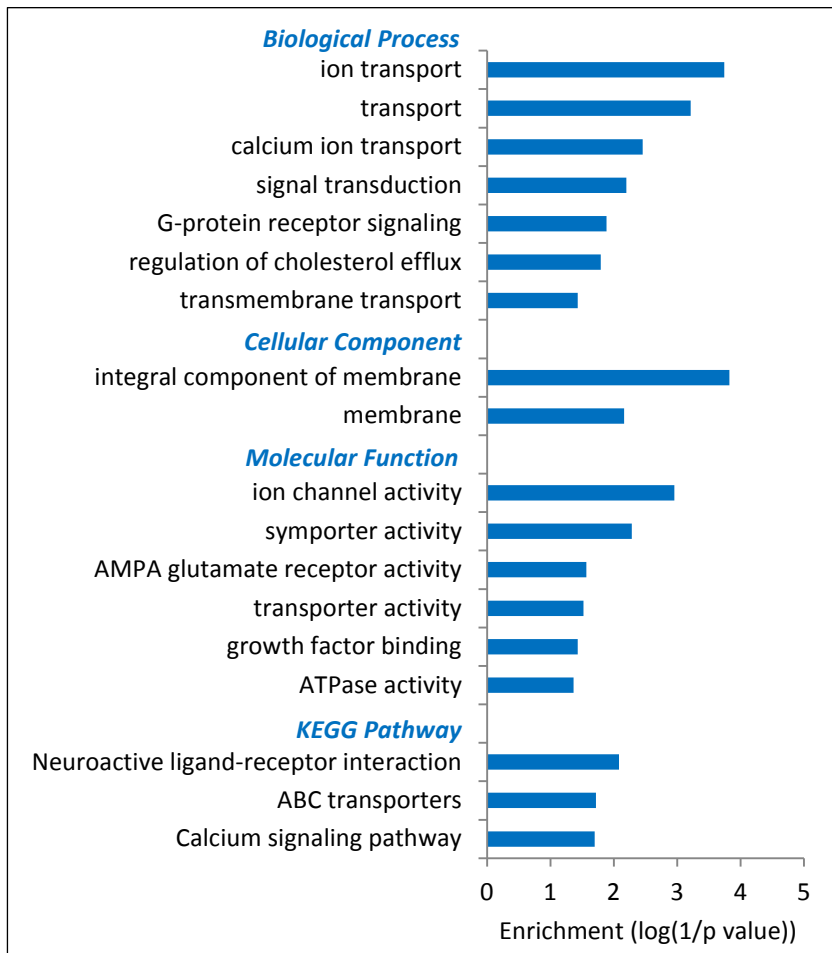

**Figure S7.** Gene Ontology Terms and KEGG pathways significantly over-represented ( $q < 0.05$ ) amongst genes for which a notable effect of early life stress was identified on both DNA methylation (p.promoters or gene bodies) and gene expression (>5% methylation difference and >2 FC expression).

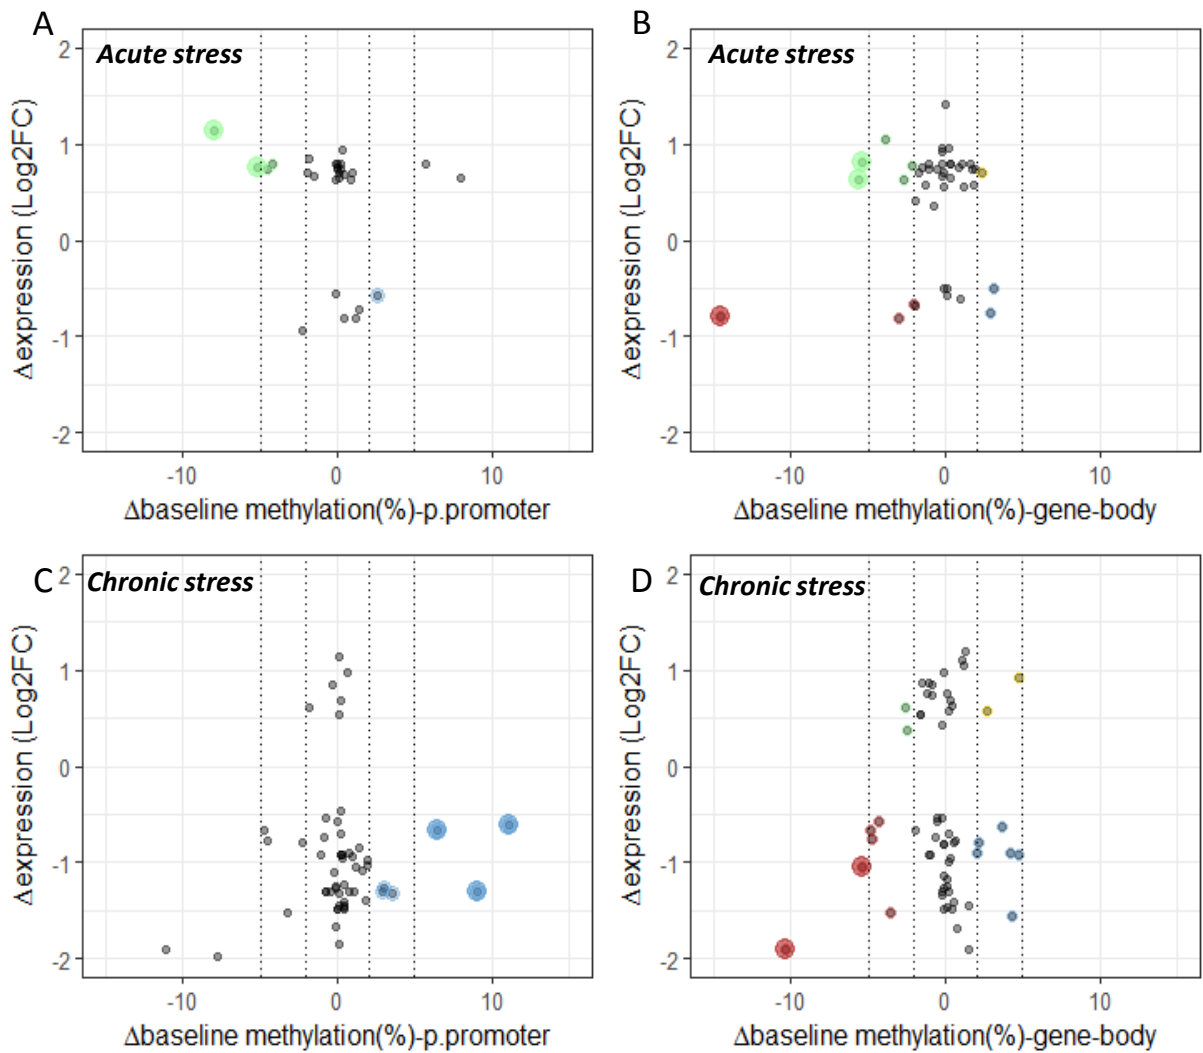

**Figure S8.** Integration of transcription and methylation data for genes for which a significant interaction between stress and transcriptional response to LPS was identified. The difference in LPS-responsive expression relative to the control group (Log2FC) is plotted against the difference in baseline methylation in the (A;C) putative promoter region and (B;D) gene-body for each stress group.
